1 **M-CSF induces a coordinated myeloid and NK cell differentiation program**  
2 **protecting against CMV after hematopoietic cell transplantation**

3

4 **Authors:** Prashanth K. Kandalla<sup>1,2†</sup>, Julien Subburayalu<sup>1,3†</sup>, Clément Cocita<sup>2,4‡</sup>, Bérengère de  
5 Laval<sup>2‡</sup>, Elena Tomasello<sup>2,4</sup>, Johanna Iacono<sup>2</sup>, Jessica Nitsche<sup>1</sup>, Maria M. Canali<sup>2</sup>, Wilfried  
6 Cathou<sup>2</sup>, Gilles Bessou<sup>2,4</sup>, Noushine Mossadegh-Keller<sup>2</sup>, Caroline Huber<sup>2</sup>, Sandrine Sarrazin<sup>1,2</sup>,  
7 Guy Mouchiroud<sup>5</sup>, Roland Bourette<sup>6</sup>, Marie-France Grasset<sup>7</sup>, Marc Dalod<sup>2,4§</sup>, Michael H.  
8 Sieweke<sup>1,2§\*</sup>

9 **Affiliations:**

10 <sup>1</sup>Center for Regenerative Therapies Dresden (CRTD), Technical University Dresden; Dresden,  
11 01307, Germany.

12 <sup>2</sup>Aix Marseille University, CNRS, INSERM, CIML; Marseille, 13009, France.

13 <sup>3</sup>Department of Internal Medicine I, University Hospital Carl Gustav Carus Dresden; Dresden,  
14 01307, Germany.

15 <sup>4</sup>Aix-Marseille University, CNRS, INSERM, CIML, Turing Center for Living Systems;  
16 Marseille, 13009, France.

17 <sup>5</sup>Institut NeuroMyoGene, UMR CNRS 5310, INSERM; Lyon, 69008, France.

18 <sup>6</sup>Institut Pasteur de Lille, CNRS, Lille University; Lille, 59000, France.

19 <sup>7</sup>CNRS UMR5534, Claude Bernard Lyon 1 University; Villeurbanne, 69100, France.

20 †These authors contributed equally to this work and share first authorship.

21 ‡These authors contributed equally to this work and share second authorship.

22 §These authors share last authorship.

23 \*Corresponding and lead author. Email: [michael.sieweke@tu-dresden.de](mailto:michael.sieweke@tu-dresden.de) (M.H.S.).

24

25 **One Sentence Summary:**

26 M-CSF drives myeloid reconstitution to support CMV-directed natural killer cell competence via  
27 IL-15/I-IFN after hematopoietic cell transplantation.

28

29 **Abstract:**

30 Immunosuppressed patients are highly susceptible to viral infections. Therapies reconstituting  
31 autologous antiviral immunocompetence could therefore represent an important prophylaxis and  
32 treatment. Herpesviridae including cytomegalovirus (CMV) are a major cause of morbidity and  
33 mortality in patients after hematopoietic cell transplantation (HCT). Here, we show in a mouse  
34 model of HCT that macrophage colony-stimulating factor (M-CSF/CSF-1), a key cytokine for  
35 myeloid and monocytic differentiation, promoted rapid antiviral activity and protection from  
36 viremia caused by murine CMV. Mechanistically, M-CSF stimulated a coordinated myeloid and  
37 natural killer (NK) cell differentiation program culminating in increased NK cell numbers and  
38 production of granzyme B and interferon- $\gamma$ . This NK cell response depended upon M-CSF-  
39 induced myelopoiesis leading to IL15R $\alpha$ -mediated presentation of IL-15 on monocytes.  
40 Furthermore, M-CSF also induced differentiation of plasmacytoid dendritic cells producing type  
41 I interferons, which supported IL-15-mediated protection. In the context of human HCT, M-CSF  
42 induced monopoiesis, increased IL15R $\alpha$  expression on monocytes and elevated numbers of  
43 functionally competent NK cells in G-CSF-mobilized human hematopoietic stem and progenitor  
44 cells. Together, our data show that M-CSF induces an integrated multistep differentiation  
45 program that culminates in increased NK cell numbers and activation, thereby protecting graft  
46 recipients from CMV infection. Thus, our results identify a mechanism by which M-CSF-  
47 induced myelopoiesis can rapidly reconstitute antiviral activity during leukopenia following  
48 HCT.  
49

50 **Key points:**

- 51 • M-CSF protects from lethal CMV viremia during leukopenia following hematopoietic
- 52 cell transplantation, a vulnerable period of immunosuppression.
- 53 • Early action of M-CSF on donor hematopoietic stem and progenitor cells rapidly
- 54 reconstitutes antiviral immune responses.
- 55 • M-CSF stimulates a coordinated myeloid-NK cell-differentiation program resulting in
- 56 increased NK cell numbers and activity.
- 57 • Increased NK cell differentiation and activity depends on M-CSF-induced myelopoiesis
- 58 generating IL-15-producing monocytes and I-IFN-producing pDCs.
- 59 • M-CSF also stimulates monopoiesis, IL15Ra expression in monocytes and functional NK
- 60 cell differentiation in G-CSF-mobilized human PBMC.
- 61 • No impaired HCT engraftment or proclivity to graft-versus-host-disease by M-CSF.
- 62 • M-CSF could provide a single cytokine therapy addressing a major medical need,
- 63 supporting current antiviral therapies during leukopenia following HCT.
- 64

65 **Visual abstract:**

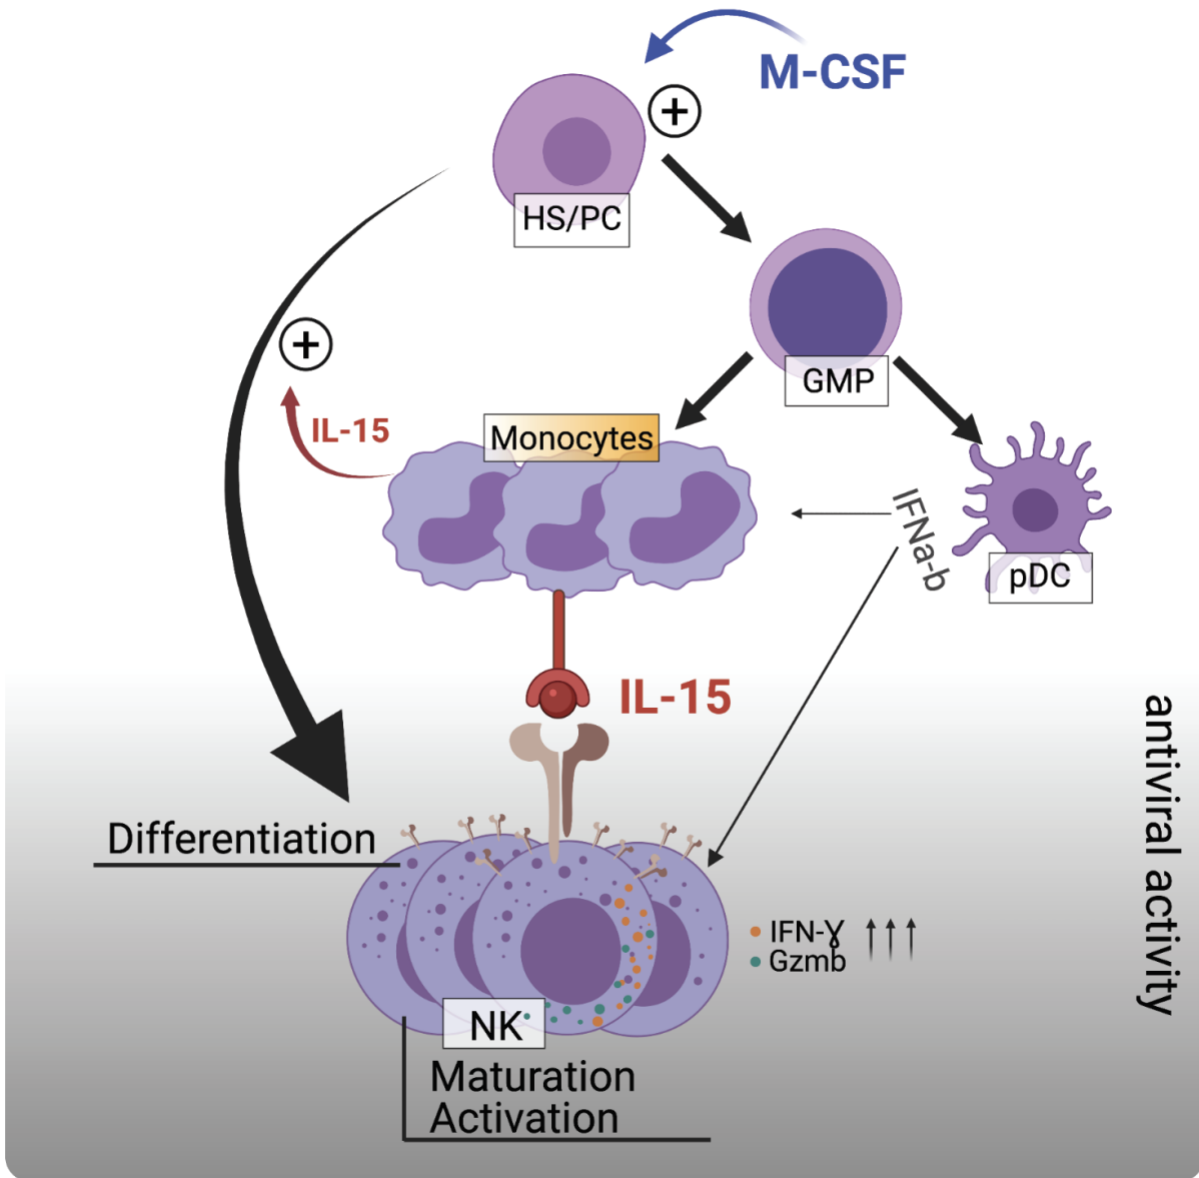

66  
67  
68

## 69 INTRODUCTION

70 The first months after hematopoietic cell transplantation (HCT) are characterized by profound  
71 immunosuppression, which leaves patients at high risk of viral infection or reactivation of  
72 common opportunistic viruses such as cytomegalovirus (CMV). The infection itself but also its  
73 subsequent treatment is associated with significant morbidity and mortality (1–5). Although  
74 vaccines against CMV are under development, they are not yet routinely available in the clinic  
75 (6). Moreover, antiviral treatments based on inhibition of viral replication are limited to specific  
76 viruses, can have significant bone marrow toxicity, and run the risk of variant development and  
77 breakthrough infections (2–5, 7). Cell-based therapies are still not widely on-hand and associated  
78 with high costs (8). Biologics stimulating the patient’s general antiviral immune response could  
79 therefore be a welcome alternative or complementary treatment option but are currently  
80 unavailable.

81 Myeloid cytokines can massively alter hematopoietic output (9) but G-CSF, the major factor in  
82 clinical use, has no effect on antiviral immunity (10). This appears likely because G-CSF confers  
83 its activity only on late myeloid progenitors and mature myeloid cells. By contrast, M-CSF,  
84 another myeloid cytokine released during infections (11–13), and known to promote  
85 myelopoiesis (14–16), can directly act on hematopoietic stem and progenitor cells (HSPCs) to  
86 induce emergency myelopoiesis (13). Importantly, in concert with the myeloid transcription  
87 factor MafB, M-CSF selectively controls asymmetric myeloid commitment division in HSPCs  
88 (17, 18). Consequently, M-CSF stimulates myeloid cell production without exhausting HSPCs  
89 (13, 19). M-CSF can protect against bacterial and fungal infections after HCT (19). However,  
90 antiviral activities of M-CSF have not been reported yet.

91 CMV can lead to a diverse range of pathologies in immunocompromised humans (20, 21) and  
92 the closely related murine CMV (MCMV) has similar cellular tropism and kinetics (22, 23). The  
93 spleen is an early site for filtering blood-borne virus and initiated immune responses, whereas the  
94 liver is a principal site of viral infection after its decline in the spleen (24). Type I interferons (I-  
95 IFNs) (25), produced by plasmacytoid dendritic cells (pDCs) (26, 27), constitute a first line of  
96 defense against CMV with natural killer (NK) cells and cytotoxic T cells coming in as a critical  
97 second and third wave of the immune response that block viral replication by killing infected  
98 cells (28). Cytokines including IL-12 and IL-15 produced by conventional dendritic cells (cDCs)  
99 can indirectly contribute to viral defense by stimulating NK cell proliferation, activation, and  
100 effector function (25, 29–31). Other myeloid cells have been shown to have indirect and diverse  
101 roles in the response to CMV infection. Whereas Ly6C<sup>-</sup>CX3CR1<sup>+</sup> patrolling monocytes act as  
102 carriers of CMV and can disseminate viral infection to distant organs throughout the body (32),  
103 Ly6C<sup>+</sup>CCR2<sup>+</sup> inflammatory monocytes can activate NK and cytotoxic memory CD8<sup>+</sup> T cells  
104 during microbial infection, including MCMV (33, 34). Culture models proved that the ability of  
105 macrophages to resist MCMV infection depends on signaling mechanisms via I-IFNs and type II  
106 IFNs (II-IFNs) (35–37), which might also be important *in vivo*. Myeloid-specific deletion of  
107 signal transducer and activator of transcription (STAT)1, a key transcription factor for mounting  
108 IFN responses, is also required for the early control of MCMV infection and spleen pathology  
109 but does not affect viral clearance (38). Hence, the role of myeloid cells in MCMV infection  
110 appears multifaceted and complex.

111 Interestingly, in the myeloid STAT1 deletion model, the ability to combat early MCMV  
112 infection correlated with the ability to mount extramedullary hematopoiesis (38). In this study we  
113 have specifically investigated the role of emergency hematopoiesis on MCMV infection under  
114 leukopenic conditions and report that M-CSF-induced myelopoiesis promotes rapid

115 reconstitution of antiviral activity and protection from infection. Using a murine model of HCT  
116 and infection with lethal doses of MCMV, we observed that M-CSF treatment prompted antiviral  
117 immunity resulting in substantially improved survival and pathogen clearance in mice.  
118 Dissecting the mechanism underlying this M-CSF-mediated protection against MCMV infection,  
119 we identified a multistep differentiation program in which M-CSF-induced myelopoiesis further  
120 stimulated NK cell differentiation and activation via IL-15 and I-IFN mediators. Lastly, we  
121 observed that M-CSF also induced intermediate monocyte differentiation from human G-CSF-  
122 mobilized HSPCs, enhanced IL15R $\alpha$  expression on monocytes and increased functional NK  
123 cells numbers.

## 124 **RESULTS**

### 125 **M-CSF protects HCT recipients from CMV viremia and mortality**

126 CMV infection/reactivation remains a perilous threat during immunosuppression (1, 39, 40).  
127 MCMV is a natural pathogen in mice that recapitulates pathomechanisms of human CMV  
128 infection (23). To study the antiviral effects of M-CSF on MCMV under leukopenic conditions,  
129 we used a murine HCT model (19). As shown in Fig. 1A, mice received three injections of  
130 murine M-CSF (41) or PBS at the time of HCT and were infected 14 days later with MCMV  
131 doses accounting for 80-90% lethality in untreated transplant recipients (fig. S1A). Survival rates  
132 significantly increased, from 25% to 81.8% in M-CSF-treated mice (Fig. 1B). Mice receiving  
133 four treatments of murine M-CSF over several days (fig. S1B) or human M-CSF (fig. S1C) both  
134 showed improved survival rates. Accordingly, we used three treatments at the time of transplant  
135 throughout the study, although singular M-CSF-treatment improved survival rates (fig. S1D).  
136 M-CSF-treated mice showed less severe liver injury with a proclivity for scarcer inflammatory  
137 foci (Fig. 1C), a reduction of apoptotic or necrotic hepatocytes (Fig. 1D) and decreased necrotic  
138 areas after MCMV infection (Fig. 1E). M-CSF-treated mice also showed a decreased viral load  
139 as shown by reduced number of infected hepatocytes (Fig. 1F), viral protein IE1 (Fig. 1G) and  
140 viral RNA copy numbers (Fig. 1H).  
141 Together, these results demonstrated that M-CSF treatment protected HCT recipients from  
142 MCMV-induced tissue damage and lethality.

### 143 **M-CSF treatment increases NK cell abundance, differentiation, and activation**

144 Since NK cells are early antiviral effector cells, including during HCT (42), we investigated  
145 whether M-CSF treatment influenced NK cells. We observed an increase in NK cell numbers in  
146 the spleen two weeks after M-CSF treatment both in uninfected mice and after infection (Fig.  
147 2A). Separate analysis of CD45.2<sup>+</sup> recipient and CD45.1<sup>+</sup> graft donor cells revealed that most of  
148 the NK cell increase arose from donor cells (fig. S2A). Since M-CSF is short-lived (43), but  
149 increased NK cell numbers two weeks after application, we posed the mechanism to act on NK  
150 cell progenitors. NK cell differentiation stages can be identified by differential expression of  
151 surface markers and transcription factors (Fig. 2B) (44–46). NK cell progenitors express CD122,  
152 CD27 and NKG2D but not the mature markers NK1.1 and NKp46. We observed that M-CSF  
153 increased the number of donor-derived CD122<sup>+</sup>CD27<sup>+</sup> NK cell progenitors both in uninfected  
154 and infected mice (Fig. 2C).  
155 Consequently, we analyzed the NK cell maturation and differentiation status, which can be  
156 distinguished into CD11b<sup>-</sup>CD27<sup>+</sup> immature, CD11b<sup>+</sup>CD27<sup>+</sup> mature M1 and CD11b<sup>+</sup>CD27<sup>-</sup>  
157 mature M2 NK cells (Fig. 2B) (47–49). M-CSF treatment increased both donor-derived  
158 immature and mature M1 and M2 NK cells, particularly in infected mice (Fig. 2D). A smaller  
159 increase of progenitor and mature cells was also observed for resident host NK cells (fig. S2B).



160 This was further confirmed by gene expression analysis of stage-specific transcription factors  
161 (Fig. 2B). 14 days after M-CSF-supported HCT and after an additional 1.5 days of MCMV or  
162 mock infection, spleen NK1.1<sup>+</sup> cells showed increased expression of the immature NK cell  
163 transcription factors *Ikaros*, *Id2*, *Runx3*, *Gata3* and *Tbet* as well as the mature NK cell  
164 transcription factor *Eomes* after exposure to MCMV (Fig. 2E). Similar observations were made  
165 for host-derived NK cells (fig. S2C). Whereas *Ikaros* and *Gata3* were more strongly induced by  
166 M-CSF in uninfected mice, *Tbet* and *Eomes* were preferentially induced after infection (Fig. 2E).  
167 Importantly, infection alone was insufficient for the observed inductions.  
168 Together, this indicated that M-CSF lead to an increased number of NK cell progenitors and  
169 enhanced their differentiation along the NK cell lineage trajectory.

### 170 **NK cells execute M-CSF-derived antiviral immunity**

171 The major antiviral activity of NK cells is mediated by the production of inflammatory cytokines  
172 like IFN $\gamma$ , and perforin-dependent delivery of granzyme B (GrB) into infected cells (50).  
173 Interestingly, M-CSF treatment increased the number of IFN $\gamma$ - (Fig. 3A) and GrB-producing NK  
174 cells (Fig. 3B) in infected mice in concert with enhanced mRNA levels (*IFNG*, *GZMB* and  
175 *PRFI*) and enriched maturation and activation genes (*CEBPA*, *MITF* and *XCL1*; Fig. 3C, fig.  
176 S2D). Consistently, M-CSF induced NK cell accumulation at infectious foci within the liver  
177 early after infection culminating in reduced numbers of MCMV-infected cells (Fig. 3D). To  
178 determine whether antiviral NK cell activity was required for the protective effect of M-CSF, we  
179 depleted NK cells using anti-NK1.1 antibodies in M-CSF-treated and MCMV-infected HCT  
180 recipients (Fig. 3E). NK cell-depletion nearly abolished the increased survival of M-CSF-treated  
181 mice, demonstrating that a significant part of the protective effect of M-CSF against viral  
182 lethality depended on NK cells.

### 183 **M-CSF-induced myelopoiesis is required for its antiviral effect**

184 Since M-CSF has not been reported to act directly on the NK cell lineage, we investigated  
185 whether M-CSF's effects on the myeloid lineage could indirectly impact on NK cell-mediated  
186 antiviral activity. M-CSF treatment can increase donor myelopoiesis in HSPC-transplanted mice  
187 (13, 19). Accordingly, M-CSF increased donor-derived GMPs, granulocytes, mononuclear  
188 phagocytes (Fig. 4A-B), pDCs and cDCs (see fig. S3A-C) two weeks after HCT. To determine  
189 whether this was relevant to the antiviral effect of M-CSF, we used complementary loss- and  
190 gain-of-function approaches. We injected anti-MCSFR/CD115 antibody 12 days after HCT,  
191 which selectively eliminates M-CSF-dependent myeloid cells (51). Myeloid cell depletion  
192 completely abolished the protective effect of M-CSF treatment in MCMV-infected HCT  
193 recipients (Fig. 4C). Affirmatively, these mice showed reduced GMPs, monocytes, cDCs and  
194 pDCs 48 hours after anti-CD115 myeloid depletion (Fig. 4D). This indicated that myeloid cells  
195 were required for the M-CSF-dependent antiviral activity. For gain-of-function experiments, we  
196 transplanted GMPs into mice without M-CSF support 10 days after HCT (Fig. 4A). GMP  
197 transplantation resulted in increased survival comparable to M-CSF treatment (Fig. 4E).  
198 Together, these experiments demonstrated that the antiviral activity of M-CSF depends upon M-  
199 CSF-induced myelopoiesis.

### 200 **M-CSF drives myeloid IL-15 trans-presentation to promote antiviral competence**

201 Since myelopoiesis and NK cell differentiation were required for the antiviral effect of M-CSF,  
202 we hypothesized that M-CSF-induced myelopoiesis could indirectly affect NK cell  
203 differentiation and antiviral activity. Indeed, anti-CD115-mediated depletion of myeloid cells  
204 resulted in reduced immature and mature NK cells (Fig. 5A). To identify myeloid signals that

205 could affect NK cells, we first focused on IL-15, a cytokine paramount for NK cell  
206 differentiation and effector functions (30, 52–54). IL-15 can be produced and trans-presented by  
207 IL15R $\alpha$  on myeloid cells (52, 55–57) including during MCMV infection (25, 58, 59). M-CSF  
208 treatment resulted in swiftly increased IL-15 mRNA levels in spleens after MCMV infection  
209 (Fig. 5B). Since IL-15 signaling requires trans-presentation by the surface molecule IL15R $\alpha$   
210 (CD215) (52, 54, 57), we analyzed the expression levels of IL15R $\alpha$  in cDCs and monocytes,  
211 both capable of stimulating NK cells via IL-15 (25, 41, 56). Both mRNA (Fig. 5C) and surface  
212 protein analysis (Fig. 5D) revealed that IL15R $\alpha$  was induced in Ly6C<sup>hi</sup> monocytes but only  
213 weakly in cDCs (Fig. 5C) or Ly6C<sup>lo</sup> monocytes (Fig. 5D).

214 Next, we analyzed the effect of increased IL-15 signaling from Ly6C<sup>hi</sup> monocytes on the  
215 expression of IL-15 response genes in NK target cells. Like IL-15 signaling, which is engaged  
216 once the IL-15/L15R $\alpha$  complex binds to IL15R $\beta$  on target cells (25, 52, 55), M-CSF treatment  
217 increased expression of the downstream genes *IL15RB* and of *STATB5*, *JAK3* and *E2F1-6* in NK  
218 cells (Fig. 5E). To check whether IL-15-dependent myeloid cell to NK cell-signaling was  
219 important for antiviral activity protecting HCT recipients from lethal MCMV infection, we  
220 compared *IL15RA*-KO GMPs incapable of trans-presenting IL-15 with WT GMPs. We observed  
221 80% survival in WT GMP-transplanted mice after infection but no survival of *IL15RA*-KO  
222 GMP-transplanted mice (50,000 GMPs for each genotype), demonstrating that IL-15 signaling  
223 from myeloid cells was required for NK cell support (Fig. 5F). Furthermore, M-CSF treatment  
224 resulted in no survival advantage in *IL15RA*-KO HCT recipient mice and was comparable to  
225 untreated WT HCT mice (Fig. 5G), indicating that IL-15 signaling was acting downstream of M-  
226 CSF.

227 Together, our data demonstrate that myeloid-derived IL-15 signaling was required for the  
228 antiviral effect derived from M-CSF-induced myelopoiesis.

### 229 **M-CSF-induced I-IFN production stimulates IL-15-dependent antiviral immunity**

230 I-IFNs contribute to the early antiviral immune response preceding NK cell activation (22, 25,  
231 60–62), and thus, may constitute a rapid response mechanism that could prevent fatal viremia  
232 during leukopenia after HCT. MCMV infection was shown to increase *IFNBI* mRNA in the  
233 spleen (26, 27). Consistently, we found enhanced *IFNBI* mRNA levels in the spleen swiftly after  
234 MCMV infection, which were augmented with M-CSF treatment (Fig. 6A). During MCMV  
235 infection, I-IFNs are predominantly produced by pDCs. We observed that pDC numbers (Fig.  
236 6B) and I-IFN-producing pDCs (Fig. 6C) were increased in the spleen of M-CSF-treated mice 14  
237 days after HCT, particularly after MCMV infection. Monocytes showed a strongly increased  
238 expression of *IFNBI* and upstream transcription factors of the IRF family (Fig. 5C). Together,  
239 this supported the notion that M-CSF treatment increased I-IFN production during MCMV  
240 infection of HCT recipients by promoting a faster reconstitution of monocytes and pDCs. This  
241 also agrees with the observation that M-CSF-driven myelopoiesis can also stimulate pDC  
242 development (63). The observed effects of both loss- and gain-of-function experiments targeted  
243 at myeloid cells (Fig. 4C-D) or transplantation of GMPs, which also give rise to pDCs, thus  
244 support the notion of I-IFNs also contributing to antiviral immunity upon M-CSF administration  
245 after HCT.

246 Beyond its direct antiviral effects on infected cells, I-IFNs can also indirectly affect the antiviral  
247 immune response by activating NK cells or by stimulating IL-15 production in myeloid cells (25,  
248 30, 62). To investigate the relative importance of I-IFNs on myeloid cells, we injected *IFNARI*-  
249 KO or WT GMPs at day 10 after HCT. *IFNARI* deficiency abolished the protective effect of  
250 GMP transplantation (Fig. 6D), indicating that I-IFN stimulation of myeloid cells was required



251 for their antiviral effect. IL-15 treatment prior to infection could partially restore the deficiency  
252 of *IFNARI*-KO GMPs (Fig. 6E), indicating the importance of I-IFN induction of IL-15  
253 production in myeloid cells.

254 Together, this suggested that the antiviral activity of I-IFNs was mainly due to its effect on the  
255 identified myeloid and NK cell differentiation program rather than a direct effect on infected  
256 cells.

### 257 **M-CSF recapitulates its effects in human G-CSF-mobilized PBMCs**

258 To determine whether M-CSF could affect myeloid and NK cell differentiation in human  
259 HSPCs, we assayed its impact on myelopoiesis, IL15R $\alpha$  expression, NK cell numbers and  
260 functional competence in HSPC-enriched PBMCs from G-CSF-mobilized stem cell donors (G-  
261 PBMCs). *In vitro* differentiation from G-PBMCs was established in the presence of stem cell  
262 factor (SCF) alone or in combination with the multi-lineage myeloid cytokine IL-3 or with M-  
263 CSF, respectively (protocol fig. S4A and the gating strategy used fig. S4B-E). Both IL-3 and  
264 particularly M-CSF fostered myelopoiesis, yielding increasing proportions of cells with  
265 monocytic and/or macrophage morphology (Fig. 7A). This observation was confirmed by flow  
266 cytometry, where we found faster and stronger reduction of CD34<sup>+</sup> progenitors (Fig. 7B-C) and a  
267 concomitant increase of CD11b<sup>+</sup> myeloid cells for M-CSF conditions (Fig. 8A-B). Consistent  
268 with a faster myeloid commitment in the presence of M-CSF, we also found increased numbers  
269 of GMPs (Fig. 7D, 8C), in particular HLA-DR<sup>+</sup> mature GMPs (Fig. 8D) (64, 65). The enhanced  
270 and accelerated frequencies of CD11b<sup>+</sup> myeloid cells after M-CSF treatment were mainly due to  
271 CD11b<sup>+</sup>CD66b<sup>-</sup> monocytic cells (Fig. 8E) rather than CD11b<sup>+</sup>CD66b<sup>+</sup> granulocytic cells (i.e.,  
272 neutrophils; data not shown). Enhanced monocytic differentiation was further confirmed by  
273 accelerated and increased CD14<sup>+</sup> monocyte generation at days 5 and 9 after M-CSF treatment  
274 (Fig. 8F). Whereas monocytes isolated from freshly isolated G-PBMCs consisted mainly of  
275 CD14<sup>+</sup>CD16<sup>-</sup> classical monocytes (CMs) (Fig. 7E, 8G), at day 9 after M-CSF treatment we  
276 observed nearly exclusively CD14<sup>+</sup>CD16<sup>+</sup> intermediate monocytes (IMs), with non-classical  
277 CD14<sup>-</sup>CD16<sup>+</sup> monocytes (NCMs) (66) remaining low under both conditions (Fig. 7E, 8G).  
278 Together, these data indicated that M-CSF also resulted in increased monopoiesis in human  
279 HSPCs with a particular enrichment in IMs.

280 As observed in murine cells, M-CSF treatment also resulted in enhanced IL15R $\alpha$  expression on  
281 CD11b<sup>+</sup> myeloid cells and CD14<sup>+</sup> monocytes (Fig. 8H) with increasing levels during  
282 differentiation on CD11b<sup>+</sup>CD66b<sup>-</sup> monocytic cells or CD14<sup>+</sup> monocytes (Fig. 8I-J). Together,  
283 this indicated that M-CSF treatment also enhanced IL-15 presentation on human monocytes.  
284 Finally, we further queried the effect of M-CSF-driven myelopoiesis and IL15R $\alpha$  signaling in  
285 human G-PBMCs on functional NK cell differentiation. We first analyzed CLPs, which  
286 encompass NK cell progenitors (67). Interestingly, CLPs were enriched in M-CSF-treated G-  
287 PBMCs, both at days 5 and 9 (Fig. 8K). Although the culture regime lacked exogenous IL-2, IL-  
288 15 or IL-21 and thus was not ideal for NK cell differentiation and survival, M-CSF-driven  
289 myelopoiesis resulted in significantly more NK cells (NKs, SSC-A<sup>low</sup>Lin<sup>-</sup>CD56<sup>+</sup>CD16<sup>+</sup>) at day 9  
290 of culture (Fig. 8L). In line with the findings in murine cells, M-CSF treatment also increased the  
291 numbers of GrB-expressing NKs (Fig. 8M) significantly on day 9 of culture compared to IL-3-  
292 driven myelopoiesis, indicating that M-CSF treatment also stimulated functionally competent  
293 human NK cell production.

294 Together, these findings indicated that the coordinated myeloid-driven NK cell differentiation  
295 and activation program initiated by M-CSF-mediated myelopoiesis in mice was translatable to  
296 the human context and was thus directly relevant for clinical conditions of HCT.

## 297 **No adverse events of M-CSF after allogeneic HCT**

298 In hematocology several indications require allogeneic HCT. To date, there are conflicting  
299 data concerning the effect of M-CSF on long-term engraftment and GvHD following allogeneic  
300 HCT (68–70). Hence, we used an allogeneic HCT model to address these points (fig. S5A).  
301 Following allogeneic HCT and assessment according to previous reports (68), we did not find  
302 any differences in the frequency of C57BL/6j CD45.1<sup>+</sup> donor HSPC-derived CD11b<sup>+</sup>F4/80<sup>+</sup>  
303 monocytes or inflammatory Ly6C<sup>HI</sup> monocytes after M-CSF treatment (fig. S5B-C).  
304 Furthermore, GvHD scoring (71) showed no statistical difference between mice treated with M-  
305 CSF or PBS, going to the lowest possible score as early as 20 days following allogeneic HCT for  
306 both conditions (fig. S5D). All mice survived M-CSF treatment and vehicle control after  
307 allogeneic HCT. We further showed that tri-lineage engraftment in the peripheral blood was not  
308 affected by M-CSF treatment at 4 and 12 weeks following allogeneic HCT (fig. S5E). Merely  
309 any residual recipient BALB/c CD45.2<sup>+</sup> cells were found (“alloHSCs” in fig. S5B), reflecting  
310 full bone marrow (BM) engraftment of CD45.1<sup>+</sup> donor cells, which we confirmed at 12 weeks  
311 (fig. S5F). These CD45.1<sup>+</sup> donor cells were unaffected by the M-CSF treatment concerning long-  
312 term engrafting HSPCs (KSL Flt3<sup>-</sup>CD150<sup>+</sup>CD48<sup>-</sup>) and GMPs alike in the BM 12 weeks after  
313 allogeneic HCT (fig. S5G).  
314 Together, our data reveal no contraindication for the short-term treatment with M-CSF following  
315 allogeneic HCT, suggesting that it should be a safe and feasible cytokine to promote antiviral  
316 activity in standard protocols of allogeneic HCT.

## 317 **DISCUSSION**

318 In this study we have identified the previously unknown protective effects of M-CSF-induced  
319 myelopoiesis against viral infection during the vulnerable leukopenic phase after HCT. We  
320 identified a coordinated differentiation program between myeloid and NK cells that plays a  
321 major role in reconstituting protection against viral infection and assigns a critical role to M-  
322 CSF-induced myelopoiesis in participating in antiviral immunity.  
323 Immunocompromised individuals are prone to opportunistic infections including CMV viremia,  
324 but also to infection-induced morbidity and mortality (1). Here, we used a murine model of  
325 immunosuppression after HCT to investigate the protective antiviral effects of M-CSF-induced  
326 myelopoiesis preceding MCMV infection. HCT is an important major therapeutic strategy that  
327 involves a conditioning therapy by which the recipient’s hematopoietic system is  
328 immunosuppressed to foster engraftment of donor HSPCs. Patients encounter severe  
329 immunodeficiency after HCT that leaves them highly vulnerable to opportunistic bacterial,  
330 fungal, and viral infection before the donor’s hematopoietic system is sufficiently reconstituted.  
331 Although improvements have been made in prophylaxis and management, viral infection, and  
332 reactivation, such as CMV, still contribute significantly to morbidity and mortality after  
333 allogeneic HCT (3, 72, 73). Unfortunately, available antiviral drugs are associated with  
334 numerous adverse events (2, 5). For example, ganciclovir severely compromises myelopoiesis,  
335 and thus further aggravates susceptibility to secondary infections (74–76) and enhances risk to  
336 secondary malignancy (77). Although progress has been made with the introduction of  
337 letermovir as non-toxic antiviral agent, it might select for virus variants and virus breakthrough  
338 infections as well as late reactivation once cessation of prophylaxis occurs (7). Furthermore, as  
339 an agent targeting viral terminase complex it is limited to be used against CMV. Adoptive  
340 transfer protocols of lymphoid progenitors also have been proposed as a therapeutic strategy in  
341 refractory or high-risk cases (8). Cell therapy approaches, however, require complex logistics,  
342 which limits their availability and leads to high costs. Given the remaining clinical need for both

343 acute and prophylactic antiviral treatments, the application of M-CSF may represent an  
344 attractive, cost-effective, and broadly applicable antiviral approach.  
345 Several properties of M-CSF make it an ideal candidate for accelerating immunocompetence  
346 recovery in HCT recipients and present key advantages over other myeloid cytokines used in  
347 clinical practice. We showed before that M-CSF directly engages HSPCs and thus intervenes at  
348 the earliest point of the differentiation hierarchy to initiate the production of innate immune cells  
349 (13, 18, 19). M-CSF prophylaxis could therefore shorten the time of immune system  
350 reconstitution to reduce the risk of infections. Other cytokines, in particular G-CSF, are also used  
351 to stimulate immune functionality. However, in contrast to M-CSF, G-CSF can only act on  
352 already existing mature or late myeloid progenitor cells to activate their functional competence.  
353 Since these cells will only develop weeks after HCT, G-CSF will be ineffective in the early  
354 phase after HCT. By acting at the earliest point of the hematopoietic differentiation hierarchy,  
355 M-CSF can stimulate myelopoiesis swiftly after conditioning therapy. Consistent with this, we  
356 showed previously that M-CSF but not G-CSF can stimulate the increased production of myeloid  
357 cells from HSPCs and protect from bacterial and fungal infections (19). Importantly, M-CSF-  
358 induced myelopoiesis neither compromises stem cell numbers or activity (18), nor comes at the  
359 expense of the generation of other blood cell lineages like platelets that are important for  
360 restoring blood clotting activity (19). Here, we report an additional advantage of M-CSF  
361 treatment by promoting rapid reconstitution of antiviral activity and protection from viral  
362 infection through a multistep myeloid and NK cell differentiation program. A significant  
363 advantage of the early action of M-CSF on HSPCs appears to be the stimulation of a  
364 combination of innate immune cells that are required to combat pathogens. Whereas G-CSF only  
365 stimulates granulocytes and their direct progenitors, M-CSF stimulates the production of i)  
366 granulocytes, mediating cytotoxic bacterial killing, ii) monocytes and macrophages, capable of  
367 pathogen control by phagocytosis and reactive oxygen production, and iii) dendritic cells with  
368 the strongest antigen presentation activity that alerts the adaptive immune system. In this study,  
369 we now show that M-CSF also induced I-IFN-producing pDCs and indirectly stimulated NK cell  
370 differentiation and activation through induction of IL-15-producing monocytic cells, which  
371 together mediated strong antiviral activity.  
372 Clinical protocols of HCT often involve allogeneic HCT and thus harbor the risk of GvHD.  
373 Interestingly, M-CSF treatment ameliorated GvHD after allogeneic HCT in a murine model (70),  
374 where M-CSF was applied at the time of transplantation similar to the protocol used in this  
375 study. A seemingly conflicting study, showing increased GvHD after M-CSF administration  
376 (68), applied M-CSF at a much later point in time. In this study, M-CSF was applied after at least  
377 two weeks, where it probably acted on infiltrating monocytes and macrophages in GvHD-  
378 affected tissue sites. In line with a beneficial role of M-CSF in GvHD, clinical data from 54  
379 patients treated with M-CSF after allogeneic HCT revealed no difference in the frequency of  
380 chronic GvHD, but severe GvHD was rather attenuated by M-CSF application compared to  
381 control groups (69). Accordingly, we observed no detrimental effect of M-CSF in allogeneic  
382 HCT mice (fig. S5B-C). Together, this indicates that M-CSF prophylaxis can boost antiviral  
383 immunity following HCT and may bring about the additional benefit of reducing the occurrence  
384 and severity of GvHD. The M-CSF prophylaxis described by us targets NK cells and pDCs,  
385 whose protective functions during CMV infection are well described (22, 78). This is important  
386 for a fast antiviral response under immunosuppressed and leukopenic conditions since an  
387 antiviral T cell response is not required and cannot be mounted. This is particularly beneficial for  
388 standard protocols of HCT, which are commonly T cell depleted. Under these circumstances, the

389 development of engrafted T cells arising from donor HSPCs occurs much later than viral  
390 reactivation during immunosuppressive leukopenia.  
391 The effect on NK cells described in this study is mediated by M-CSF-induced myelopoiesis, in  
392 particular monocytes. The role of monocytes and macrophages in CMV infection is multifaceted.  
393 On the one hand, they can be target cells for MCMV infection (79–81), thus serving as vehicles  
394 of CMV dissemination (32, 82). On the other hand, the observation that macrophage depletion  
395 increased MCMV burden (79), also support a protective role during CMV infection. This  
396 ambiguity might be dependent on the context of infection or on the specific monocyte  
397 subpopulation. Whereas Ly6C<sup>-</sup>CX3CR1<sup>hi</sup> patrolling monocytes are involved in dissemination  
398 (32), Ly6C<sup>+</sup>CCR2<sup>+</sup> inflammatory monocytes can engage antiviral responses in early infection via  
399 direct or indirect mechanisms (33, 34, 38, 80, 83). Ly6C<sup>+</sup>CCR2<sup>+</sup> inflammatory monocytes could  
400 initiate differentiation of memory CD8<sup>+</sup> T and NK cells into antimicrobial effector cells (33) or  
401 showed direct iNOS-mediated antiviral effects (34). I-IFN signaling is also important for  
402 recruitment of CCR2<sup>+</sup> inflammatory monocytes via MCP-1/CCL2 (83). Thus, mice deficient for  
403 MCP-1 or CCR2 showed a reduced accumulation of monocyte-derived macrophages and NK  
404 cells in liver, increased viral titers, widespread virus-induced liver pathology and reduced  
405 survival (80, 84). Previously, it was shown that CD11c<sup>hi</sup> DC-derived IL-15 promoted NK cell  
406 priming (56) and that inflammatory monocyte-derived IL-15 could stimulate NK cell  
407 differentiation (33). In the immunosuppressed settings investigated here, Ly6C<sup>hi</sup> monocytes  
408 appeared to be more important than DCs for IL-15 presentation, since they expressed higher  
409 levels of IL15R $\alpha$  required for IL-15 cross-presentation to NK cells (56). Consistent with the  
410 synergistic role of IL-15 and I-IFNs for NK cell activation (30, 56), we observed that both  
411 *IL15RA*- and *IFNAR1*-deficiency in GMP-derived myeloid cells abolished their protective effect  
412 against MCMV, whereas ectopic IL-15 could rescue *IFNAR1*-deficiency. This suggested that IL-  
413 15 induction in monocytes required I-IFNs that were mainly produced by M-CSF-induced pDCs.  
414 Together, our experiments revealed the surprising capacity of M-CSF to initiate a fully  
415 synchronized differentiation program and cytokine mediated crosstalk between different myeloid  
416 and NK cell lineages to provide effective antiviral prophylaxis during leukopenia following  
417 HCT-mediated immunosuppression.  
418 However, further studies are needed to evaluate the clinical employability of M-CSF after HCT  
419 as a prophylaxis of CMV infection in humans. For this, phase I/II clinical trials will be needed to  
420 evaluate the addition of M-CSF to the currently licensed cytokine treatment options comprising  
421 of G-CSF and GM-CSF.

## 422 MATERIALS AND METHODS

### 423 Study design

424 The experiments in this study were design to examine the relevance of M-CSF to support  
425 myeloid reconstitution and myeloid-driven support of antiviral competence of NK cells against  
426 dormant viruses such as Herpesviridae. For this reason, we chose CMV since it is highly relevant  
427 in the human context causing high morbidity and mortality after HCT. We sought to investigate  
428 the mechanism of M-CSF-driven antiviral protection. WT or gain-of-function/loss-of-function  
429 approaches were used in C57BL6 mice. The animals were used to assess the *in vivo* impact of  
430 M-CSF on viral load, histological features of CMV pathology, impact on myeloid and NK cell  
431 differentiation, or overall survival by RNA profiles and flow cytometry and using antibody-  
432 depletion approaches. Allogeneic transplantations of C57BL6/j mice stem cells into BALB/c  
433 recipient mice were performed to demonstrate safety of M-CSF administration and its effect on



434 myeloid reconstitution in an allogeneic HCT model. All mouse experiments were performed  
435 under specific pathogen-free conditions in accordance with institutional and national guidelines  
436 under permit numbers APAFIS #17258-2018102318448168-v5 and APAFIS #36188-  
437 2022032912082580-v6 monitored daily for signs of morbidity. To demonstrate translatability of  
438 the M-CSF-induced mechanisms in the G-CSF-mobilized PBMCs from human stem cell donors  
439 were obtained from leukapheresis samples from the Department of Transfusion Medicine of the  
440 TU Dresden. The use of human samples was approved by the ethical review committee of the  
441 TU Dresden (approval no. EK477112016 and EK393092016) and all human research conformed  
442 to the Declaration of Helsinki. Informed consent was obtained from all participants.

#### 443 **Mice and *in vivo* treatments**

444 For reconstitution 3,000 c-Kit/CD117<sup>+</sup>Sca1<sup>+</sup>Lin<sup>-</sup> HSPCs, isolated using a lineage depletion kit  
445 (Miltenyi Biotec) and FACS sorting from 6–8-week CD45.1<sup>+</sup> bone marrow, were injected with  
446 150,000 cKit<sup>-</sup>Ter119<sup>+</sup> CD45.2<sup>+</sup> carrier cells (Miltenyi Biotec) and murine (baculovirus  
447 expressed) or human recombinant M-CSF (Chiron/Novartis) in 200  $\mu$ L PBS retroorbitally into  
448 lethally irradiated (160 kV, 25 mA, 6.9 Gy) 8-14 weeks sex-matched CD45.2<sup>+</sup> mice as described  
449 previously (13, 18). Myeloid or NK cells were depleted by multiple intraperitoneal injections of  
450 100  $\mu$ g of rat anti-CD115 (51), anti-NK1.1 mAb (60) or control IgG in PBS before MCMV  
451 infection as indicated. 50,000 granulocyte-monocyte progenitors (GMPs) (Lin<sup>-</sup>CD117<sup>+</sup>Sca1<sup>-</sup>  
452 CD34<sup>+</sup>CD16/32<sup>+</sup>) from WT or *IL15R $\alpha$* -KO or *IFNAR1*-KO mice were FACS sorted and injected  
453 on day 10 after HCT.

454 For allogeneic HCT, BALB/c CD45.2<sup>+</sup> recipient and C57BL/6j CD45.1<sup>+</sup> donor mice were used.  
455 In brief, BALB/c CD45.2<sup>+</sup> recipient mice were irradiated with 5 Gy, followed by allogeneic  
456 HCT after 24 hours. Imminently before (one hour) or shortly after (five and 20 hours) allogeneic  
457 HCT with 2 x 10<sup>5</sup> Lin<sup>-</sup> HSPCs from C57BL76j CD45.1<sup>+</sup> donors, the mice received PBS or 10  $\mu$ g  
458 of baculoviral expressed human M-CSF. Following alloHCT, scoring for graft-versus-host-  
459 disease (GvHD) was performed according to Lai *et al.* (71) on days five, ten, 13, 15, 20 and 30,  
460 as well as donor HSPC-derived blood cells were ascertained on day 30 in accordance with  
461 Alexander *et al.* (68).

#### 462 **MCMV infection, viral loads and histopathology**

463 Two weeks after HCT, mice were injected intraperitoneally with 5,000 PFU MCMV K181 v70  
464 in 200  $\mu$ L PBS. Viral loads were measured by quantitative reverse transcription polymerase  
465 chain reaction (RT-qPCR) of *Ie1* mRNA (25) extracted from frozen tissues 36-40 hours (1.5  
466 days) or 72 hours as reported previously (60). Paraformaldehyde-fixed (4%), paraffin-embedded  
467 and hematoxylin and eosin (H&E)-stained liver sections were scored by a trained veterinary  
468 pathologist blinded to sample identity for indicated parameters.

#### 469 **Human hematopoietic stem and progenitor cell differentiation**

470 Human G-CSF-mobilized HSPCs were obtained from leukapheresis samples from the  
471 Department of Transfusion Medicine of the TU Dresden. On the day of donation, a Ficoll-  
472 density gradient centrifugation step was performed as described previously (85) to isolate the  
473 peripheral blood mononuclear cell (PBMC) layer containing mainly mononuclear cells, T cells,  
474 NK cells, HSPCs and low-density granulocytes. To evaluate the effect of M-CSF on selective co-  
475 cultures between mononuclear cells, NK cells and HSPCs, T cells and low-density granulocytes  
476 were depleted with anti-CD3 and anti-CD15 microbeads using a QuadroMACS separator  
477 (Miltenyi Biotec, Cat. 130-090-976) and LS columns (Miltenyi Biotec, Cat. 130-042-401). Cell  
478 viability and purity of selection were confirmed by light microscopic assessment of modified

479 Giemsa stained cytopins as detailed previously (86).  $2 \times 10^5$  cells ( $1 \times 10^6$  cells  $\text{mL}^{-1}$ ) of the  
480 CD3/CD15-depleted G-CSF-mobilized PBMCs were subsequently transferred to 96U-bottom  
481 ultralow adherence plates (Nunclon Sphera, Cat. 174925) to be cultured in StemPro34 serum-  
482 free medium (Gibco, Cat. 10639011) with 1x penicillin/streptomycin (Thermo Fisher, Cat.  
483 15140122) supplemented with stem cell factor (SCF) (R&D, Cat. 255-SC-050/CF, 20 ng  $\text{mL}^{-1}$ )  $\pm$   
484 the following cytokine compositions: a) none, b) recombinant human IL-3 (R&D, Cat. 203-IL-  
485 050/CF, 25 ng  $\text{mL}^{-1}$ ) or c) human M-CSF recombinant protein (Invitrogen, Cat. PHC9501, 100  
486 ng  $\text{mL}^{-1}$ ). A partial medium change was performed every 48 hours with 2x cytokine composites  
487 to replenish cytokines. Cell differentiation and viability were confirmed using cytopins on days  
488 5 and 9.

### 489 **Flow cytometry analysis**

490 Spleen leukocyte suspensions were prepared using DNase I and collagenase D (25). For FACS  
491 sorting and analysis, we used previously reported protocols (13, 19), published HSPC definitions  
492 (87), indicated antibodies (see table S1), FACSCanto, LSRI, LSRII and FACSARIAIII equipment  
493 and DIVA software (BD), analyzing only populations with at least 200 events.

494 For human samples, an antibody panel was used to distinguish progenitors of human HSPCs  
495 ( $\text{Lin}^- \text{CD34}^+$ ) such as common lymphoid progenitors (CLPs,  $\text{Lin}^- \text{CD34}^+ \text{CD38}^{\text{low}} \text{CD45RA}^+$ ),  
496 common myeloid progenitors (CMPs,  $\text{Lin}^- \text{CD34}^+ \text{CD38}^+ \text{CD45RA}^-$ ) or granulocyte-macrophage  
497 progenitors (GMPs,  $\text{Lin}^- \text{CD34}^+ \text{CD38}^+ \text{CD45RA}^+$ ) with mature GMPs additionally expressing  
498 HLA-DR from mature myeloid cells (either  $\text{CD11b}^+ \text{CD66b}^-$  or  $\text{Lin}^+ \pm \text{CD14/CD16}$ ) whose  
499 IL15R $\alpha$  expression was quantified. For NK cell abundance and activity, an optimized panel as  
500 published previously was used (88). For flow cytometry,  $2 \times 10^5$  cells were harvested on the day  
501 of seeding (day 0) or on days 5 and 9, respectively.

### 502 **Immunofluorescence**

503 Freshly frozen OCT embedded (Sakura Finetek). 8  $\mu\text{m}$  sections (Leica CM3050 S cryostat) were  
504 fixed 10' in 4°C acetone, blocked 30' with PBS/2%BSA, stained with 1:100 directly coupled  
505 antibody (see table S2) in PBS/2%BSA for 1 hour, mounted in ProlongGold (Invitrogen) and  
506 acquired on a LSM780 Carl Zeiss microscope.

### 507 **Microfluidic real-time RT-PCR gene expression analysis**

508 Total mRNA extraction from 50,000 FACS-sorted cells and cDNA synthesis were performed  
509 with  $\mu\text{MACS}$  one step T7 template kit (Miltenyi) and specific gene expression (primers in table  
510 S3) was detected according to Fluidigm protocols as previously described (89) or by SybrGreen  
511 method (13). Ct values were calculated by BioMark Real-time PCR Analysis software  
512 (Fluidigm) using the  $\Delta\Delta\text{Ct}$  method and *HPRT* for normalization.

### 513 **Statistical analysis**

514 Multiple statistical methods, including Student's *t* test, Mann-Whitney *U*-test, log-rank (Mantel-  
515 Cox) test were used in this study depending on the data type, and the details can be found in the  
516 figure legends: test used and exact value of *n*. Data between two groups were analyzed with  
517 unpaired Student's *t* tests. All statistical analyses were performed using GraphPad Prism (9.4.1).  
518 All data were expressed as medians + individual data points or means  $\pm$  SEM. *P* values less than  
519 0.05 were considered significant.

### 520 **Supplementary Materials**

521 This file includes:



522 Figs. S1 to S5

523 Tables S1 to S3

524

## 525 References

- 526 1. C. Arber, A. BitMansour, T. E. Sparer, J. P. Higgins, E. S. Mocarski, I. L. Weissman, J. A. Shizuru, J. M. Y.  
527 Brown, Common lymphoid progenitors rapidly engraft and protect against lethal murine cytomegalovirus infection  
528 after hematopoietic stem cell transplantation. *Blood* **102**, 421–428 (2003).
- 529 2. A. Ahmed, Antiviral Treatment of Cytomegalovirus Infection *Infect Disord Drug Targets* **11**, 475–503 (2011).
- 530 3. M. Boeckh, P. Ljungman, How I treat cytomegalovirus in hematopoietic cell transplant recipients. *Blood* **113**,  
531 5711–5719 (2009).
- 532 4. S. Y. Cho, D. G. Lee, H. J. Kim, Cytomegalovirus infections after hematopoietic stem cell transplantation:  
533 Current status and future immunotherapy. *Int J Mol Sci* **20** (2019), doi:10.3390/ijms20112666.
- 534 5. F. el Chaer, D. P. Shah, R. F. Chemaly, How i treat resistant cytomegalovirus infection in hematopoietic cell  
535 transplantation recipients. *Blood* **128**, 2624–2636 (2016).
- 536 6. S. Plotkin, The history of vaccination against cytomegalovirus. *Med Microbiol Immunol* **204**, 247–254 (2015).
- 537 7. J. A. Hill, D. Zamora, H. Xie, L. A. Thur, C. Delaney, A. Dahlberg, S. A. Pergam, W. M. Leisenring, M. Boeckh,  
538 F. Milano, Delayed-onset cytomegalovirus infection is frequent after discontinuing letermovir in cord blood  
539 transplant recipients. *Blood Adv* **5**, 3113–3119 (2021).
- 540 8. T. Kaeuferle, R. Krauss, F. Blaeschke, S. Willier, T. Feuchtinger, Strategies of adoptive T -cell transfer to treat  
541 refractory viral infections post allogeneic stem cell transplantation. *J Hematol Oncol* **12**, 1–10 (2019).
- 542 9. S. Boettcher, M. G. Manz, Regulation of Inflammation- and Infection-Driven Hematopoiesis. *Trends Immunol* **38**,  
543 345–357 (2017).
- 544 10. M. Heuser, A. Ganser, C. Bokemeyer, Use of Colony-Stimulating Factors for Chemotherapy-Associated  
545 Neutropenia: Review of Current Guidelines. *Semin Hematol* **44**, 148–156 (2007).
- 546 11. C. Cheers, E. R. Stanley, Macrophage production during murine listeriosis: Colony-stimulating factor 1 (CSF-1)  
547 and CSF-1-binding cells in genetically resistant and susceptible mice. *Infect Immun* **56**, 2972–2978 (1988).
- 548 12. P. Roth, A. Bartocci, E. R. Stanley, Lipopolysaccharide induces synthesis of mouse colony-stimulating factor-1  
549 in vivo. *J Immunol* **158**, 3874–80 (1997).
- 550 13. N. Mossadegh-Keller, S. Sarrazin, P. K. Kandalla, L. Espinosa, E. Richard Stanley, S. L. Nutt, J. Moore, M. H.  
551 Sieweke, M-CSF instructs myeloid lineage fate in single haematopoietic stem cells. *Nature* **497**, 239–243 (2013).
- 552 14. D. Metcalf, ASH 50th anniversary review Hematopoietic cytokines. *Blood* **111**, 485–491 (2009).
- 553 15. K. Motoyoshi, Biological activities and clinical application of M-CSF. *Int J Hematol* **67**, 109–122 (1998).
- 554 16. I. Ushach, A. Zlotnik, Biological role of granulocyte macrophage colony-stimulating factor (GM-CSF) and  
555 macrophage colony-stimulating factor (M-CSF) on cells of the myeloid lineage. *J Leukoc Biol* **100**, 481–489 (2016).
- 556 17. S. Sarrazin, M. Sieweke, Integration of cytokine and transcription factor signals in hematopoietic stem cell  
557 commitment. *Semin Immunol* **23**, 326–334 (2011).
- 558 18. S. Sarrazin, N. Mossadegh-Keller, T. Fukao, A. Aziz, F. Mourcin, L. Vanhille, L. Kelly Modis, P. Kastner, S.  
559 Chan, E. Duprez, C. Otto, M. H. Sieweke, MafB Restricts M-CSF-Dependent Myeloid Commitment Divisions of  
560 Hematopoietic Stem Cells. *Cell* **138**, 300–313 (2009).
- 561 19. P. K. Kandalla, S. Sarrazin, K. Molawi, C. Berruyer, D. Redelberger, A. Favel, C. Bordi, S. de Bentzmann, M.  
562 H. Sieweke, M-CSF improves protection against bacterial and fungal infections after hematopoietic stem/progenitor  
563 cell transplantation. *Journal of Experimental Medicine* **213**, 2269–2279 (2016).
- 564 20. P. Griffiths, I. Baraniak, M. Reeves, The pathogenesis of human cytomegalovirus. *J Pathol* **235**, 288–297  
565 (2015).
- 566 21. P. Griffiths, M. Reeves, Pathogenesis of human cytomegalovirus in the immunocompromised host. *Nature*  
567 *Reviews Microbiology* 2021 19:12 **19**, 759–773 (2021).
- 568 22. Y. O. Alexandre, C. D. Cocita, S. Ghilas, M. Dalod, Deciphering the role of DC subsets in MCMV infection to  
569 better understand immune protection against viral infections. *Front Microbiol* **5**, 1–20 (2014).
- 570 23. A. Krmptic, I. Bubic, B. Polic, P. Lucin, S. Jonjic, Pathogenesis of murine cytomegalovirus infection. *Microbes*  
571 *Infect* **5**, 1263–1277 (2003).
- 572 24. K. M. Hsu, J. R. Pratt, W. J. Akers, S. I. Achilefu, W. M. Yokoyama, Murine cytomegalovirus displays selective  
573 infection of cells within hours after systemic administration. *Journal of General Virology* **90**, 33–43 (2009).

- 574 25. T. Baranek, T. P. V. Manh, Y. Alexandre, M. A. Maqbool, J. Z. Cabeza, E. Tomasello, K. Crozat, G. Bessou, N.  
575 Zucchini, S. H. Robbins, E. Vivier, U. Kalinke, P. Ferrier, M. Dalod, Differential responses of immune cells to type  
576 i interferon contribute to host resistance to viral infection. *Cell Host Microbe* **12**, 571–584 (2012).
- 577 26. M. Dalod, T. P. Salazar-Mather, L. Malmgaard, C. Lewis, C. Asselin-Paturel, F. Brière, G. Trinchieri, C. A.  
578 Biron, Interferon  $\alpha/\beta$  and interleukin 12 responses to viral infections: Pathways regulating dendritic cell cytokine  
579 expression in vivo. *Journal of Experimental Medicine* **195**, 517–528 (2002).
- 580 27. N. Zucchini, G. Bessou, S. H. Robbins, L. Chasson, A. Raper, P. R. Crocker, M. Dalod, Individual plasmacytoid  
581 dendritic cells are major contributors to the production of multiple innate cytokines in an organ-specific manner  
582 during viral infection. *Int Immunol* **20**, 45–56 (2008).
- 583 28. J. S. Orange, C. A. Biron, Characterization of early IL-12, IFN- $\alpha$ , and TNF effects on antiviral state and  
584 NK cell responses during murine cytomegalovirus infection. *J Immunol* **156**, 4746–56 (1996).
- 585 29. M. Dalod, T. Hamilton, R. Salomon, T. P. Salazar-Mather, S. C. Henry, J. D. Hamilton, C. A. Biron, Dendritic  
586 cell responses to early murine cytomegalovirus infection: Subset functional specialization and differential regulation  
587 by interferon  $\alpha/\beta$ . *Journal of Experimental Medicine* **197**, 885–898 (2003).
- 588 30. K. B. Nguyen, T. P. Salazar-Mather, M. Y. Dalod, J. B. van Deusen, X. Wei, F. Y. Liew, M. A. Caligiuri, J. E.  
589 Durbin, C. A. Biron, Coordinated and Distinct Roles for IFN- $\alpha$ , IL-12, and IL-15 Regulation of NK Cell Responses  
590 to Viral Infection. *The Journal of Immunology* **169**, 4279–4287 (2002).
- 591 31. F. Puttur, M. Francozo, G. Solmaz, C. Bueno, M. Lindenberg, M. Gohmert, M. Swallow, D. Tufa, R. Jacobs, S.  
592 Lienenklaus, A. A. Köhl, L. Borkner, L. Cicin-Sain, B. Holzmann, H. Wagner, L. Berod, T. Sparwasser,  
593 Conventional Dendritic Cells Confer Protection against Mouse Cytomegalovirus Infection via TLR9 and MyD88  
594 Signaling. *Cell Rep* **17**, 1113–1127 (2016).
- 595 32. L. P. Daley-Bauer, L. J. Roback, G. M. Wynn, E. S. Mocarski, Cytomegalovirus hijacks CX3CR1hi patrolling  
596 monocytes as immune-privileged vehicles for dissemination in mice. *Cell Host Microbe* **15**, 351–362 (2014).
- 597 33. S. M. H. Soudja, A. L. Ruiz, J. C. Marie, G. Lauvau, Inflammatory Monocytes Activate Memory CD8+ T and  
598 Innate NK Lymphocytes Independent of Cognate Antigen during Microbial Pathogen Invasion. *Immunity* **37**, 549–  
599 562 (2012).
- 600 34. T. L. Rovis, P. K. Brlic, N. Kaynan, V. J. Lisnic, I. Brizic, S. Jordan, A. Tomic, D. Kvestak, M. Babic, P.  
601 Tsukerman, M. Colonna, U. Koszinowski, M. Messerle, O. Mandelboim, A. Krmpotic, S. Jonjic, Inflammatory  
602 monocytes and NK cells play a crucial role in DNAM-1-dependent control of cytomegalovirus infection. *Journal of*  
603 *Experimental Medicine* **213**, 1835–1850 (2016).
- 604 35. K. A. Kropp, K. A. Robertson, G. Sing, S. Rodriguez-Martin, M. Blanc, P. Lacaze, M. F. B. N. Hassim, M. R.  
605 Khondoker, A. Busche, P. Dickinson, T. Forster, B. Strobl, M. Mueller, S. Jonjic, A. Angulo, P. Ghazal, Reversible  
606 Inhibition of Murine Cytomegalovirus Replication by Gamma Interferon (IFN- $\gamma$ ) in Primary Macrophages Involves  
607 a Primed Type I IFN-Signaling Subnetwork for Full Establishment of an Immediate-Early Antiviral State. *J Virol*  
608 **85**, 10286–10299 (2011).
- 609 36. R. M. Presti, D. L. Popkin, M. Connick, S. Paetzold, H. W. Virgin IV, Novel cell type-specific antiviral  
610 mechanism of interferon  $\gamma$  action in macrophages. *Journal of Experimental Medicine* **193**, 483–496 (2001).
- 611 37. B. Strobl, I. Bubic, U. Bruns, R. Steinborn, R. Lajko, T. Kolbe, M. Karaghiosoff, U. Kalinke, S. Jonjic, M.  
612 Müller, Novel Functions of Tyrosine Kinase 2 in the Antiviral Defense against Murine Cytomegalovirus. *The*  
613 *Journal of Immunology* **175**, 4000–4008 (2005).
- 614 38. R. Gawish, T. Bulat, M. Biaggio, C. Lassnig, Z. Bago-Horvath, S. Macho-Maschler, A. Poelzl, N. Simonović,  
615 M. Prchal-Murphy, R. Rom, L. Amenitsch, L. Ferrarese, J. Kornhoff, T. Lederer, J. Svinka, R. Eferl, M. Bosmann,  
616 U. Kalinke, D. Stoiber, V. Sexl, A. Krmpotić, S. Jonjić, M. Müller, B. Strobl, Myeloid Cells Restrict MCMV and  
617 Drive Stress-Induced Extramedullary Hematopoiesis through STAT1. *Cell Rep* **26**, 2394-2406.e5 (2019).
- 618 39. P. Ljungman, M. Boeckh, H. H. Hirsch, F. Josephson, J. Lundgren, G. Nichols, A. Pikis, R. R. Razonable, V.  
619 Miller, P. D. Griffiths, Definitions of cytomegalovirus infection and disease in transplant patients for use in clinical  
620 trials. *Clinical Infectious Diseases* **64**, 87–91 (2017).
- 621 40. F. Locatelli, A. Bertaina, V. Bertaina, P. Merli, Cytomegalovirus in hematopoietic stem cell transplant recipients  
622 - management of infection. *Expert Rev Hematol* **9**, 1093–1105 (2016).
- 623 41. J. Domínguez-Andrés, L. Feo-Lucas, M. Minguito de la Escalera, L. González, M. López-Bravo, C. Ardavín,  
624 Inflammatory Ly6Chigh Monocytes Protect against Candidiasis through IL-15-Driven NK Cell/Neutrophil  
625 Activation. *Immunity* **46**, 1059-1072.e4 (2017).
- 626 42. M. A. Ullah, G. R. Hill, S. K. Tey, Functional reconstitution of natural killer cells in allogeneic hematopoietic  
627 stem cell transplantation. *Front Immunol* **7**, 1–8 (2016).
- 628 43. K. Koths, Structure – Function Studies on Human Macrophage Colony – Stimulating Factor ( M-CSF ). **38**, 31–  
629 38 (1997).

- 630 44. C. A. J. Vosshenrich, J. P. di Santo, Developmental programming of natural killer and innate lymphoid cells.  
631 *Curr Opin Immunol* **25**, 130–138 (2013).
- 632 45. N. D. Huntington, S. L. Nutt, S. Carotta, Regulation of murine natural killer cell commitment. *Front Immunol* **4**,  
633 1–8 (2013).
- 634 46. N. Serafini, C. A. J. Vosshenrich, J. P. di Santo, Transcriptional regulation of innate lymphoid cell fate. *Nat Rev*  
635 *Immunol* **15**, 415–428 (2015).
- 636 47. S. Kim, K. Iizuka, H. S. P. Kang, A. Dokun, A. R. French, S. Greco, W. M. Yokoyama, In vivo developmental  
637 stages in murine natural killer cell maturation. *Nat Immunol* **3**, 523–528 (2002).
- 638 48. L. Chiossone, J. Chaix, N. Fuseri, C. Roth, E. Vivier, T. Walzer, Maturation of mouse NK cells is a 4-stage  
639 developmental program. *Blood* **113**, 5488–5496 (2009).
- 640 49. Y. Hayakawa, M. J. Smyth, CD27 Dissects Mature NK Cells into Two Subsets with Distinct Responsiveness  
641 and Migratory Capacity. *The Journal of Immunology* **176**, 1517–1524 (2006).
- 642 50. J. F. Bukowski, B. A. Woda, R. M. Welsh, Pathogenesis of murine cytomegalovirus infection in natural killer  
643 cell-depleted mice. *J Virol* **52**, 119–128 (1984).
- 644 51. E. Tagliani, C. Shi, P. Nancy, C. S. Tay, E. G. Pamer, A. Erlebacher, Coordinate regulation of tissue  
645 macrophage and dendritic cell population dynamics by CSF-1. *Journal of Experimental Medicine* **208**, 1901–1916  
646 (2011).
- 647 52. N. D. Huntington, N. Legrand, N. L. Alves, B. Jaron, K. Weijer, A. Plet, E. Corcuff, E. Mortier, Y. Jacques, H.  
648 Spits, J. P. di Santo, IL-15 trans-presentation promotes human NK cell development and differentiation in vivo.  
649 *Journal of Experimental Medicine* **206**, 25–34 (2009).
- 650 53. J. E. Boudreau, K. B. Stephenson, F. Wang, A. A. Ashkar, K. L. Mossman, L. L. Lenz, K. L. Rosenthal, J. L.  
651 Bramson, B. D. Lichty, Y. Wan, IL-15 and type I interferon are required for activation of tumoricidal NK cells by  
652 virus-infected dendritic cells. *Cancer Res* **71**, 2497–2506 (2011).
- 653 54. V. Budagian, E. Bulanova, R. Paus, S. Bulfone-Paus, IL-15/IL-15 receptor biology: A guided tour through an  
654 expanding universe. *Cytokine Growth Factor Rev* **17**, 259–280 (2006).
- 655 55. M. Patidar, N. Yadav, S. K. Dalai, Interleukin 15: A key cytokine for immunotherapy. *Cytokine Growth Factor*  
656 *Rev* **31**, 49–59 (2016).
- 657 56. M. Lucas, W. Schachterle, K. Oberle, P. Aichele, A. Diefenbach, Dendritic Cells Prime Natural Killer Cells by  
658 trans-Presenting Interleukin 15. *Immunity* **26**, 503–517 (2007).
- 659 57. E. F. Castillo, S. W. Stonier, L. Frasca, K. S. Schluns, Dendritic Cells Support the In Vivo Development and  
660 Maintenance of NK Cells via IL-15 Trans-Presentation. *The Journal of Immunology* **183**, 4948–4956 (2009).
- 661 58. S. Ghilas, M. Ambrosini, J. C. Cancel, C. Brousse, M. Massé, H. Lelouard, M. Dalod, K. Crozat, Natural killer  
662 cells and dendritic epidermal  $\gamma\delta$  T cells orchestrate type 1 conventional DC spatiotemporal repositioning toward  
663 CD8<sup>+</sup> T cells. *iScience* **24** (2021), doi:10.1016/j.isci.2021.103059.
- 664 59. T. A. Fehniger, S. F. Cai, X. Cao, A. J. Bredemeyer, R. M. Presti, A. R. R. French, T. J. Ley, Acquisition of  
665 Murine NK Cell Cytotoxicity Requires the Translation of a Pre-existing Pool of Granzyme B and Perforin mRNAs.  
666 *Immunity* **26**, 798–811 (2007).
- 667 60. C. Cocita, R. Guiton, G. Bessou, L. Chasson, M. Boyron, K. Crozat, M. Dalod, Natural Killer Cell Sensing of  
668 Infected Cells Compensates for MyD88 Deficiency but Not IFN-I Activity in Resistance to Mouse  
669 Cytomegalovirus. *PLoS Pathog* **11**, 1–23 (2015).
- 670 61. J. Liu, X. Guan, X. Ma, Interferon regulatory factor 1 is an essential and direct transcriptional activator for  
671 interferon  $\gamma$ -induced RANTES/CC15 expression in macrophages. *Journal of Biological Chemistry* **280**, 24347–  
672 24355 (2005).
- 673 62. M. A. Degli-Esposti, M. J. Smyth, Close encounters of different kinds: Dendritic cells and NK cells take centre  
674 stage. *Nat Rev Immunol* **5**, 112–124 (2005).
- 675 63. B. Fancke, M. Suter, H. Hochrein, M. O’Keeffe, M-CSF: A novel plasmacytoid and conventional dendritic cell  
676 poietin. *Blood* **111**, 150–159 (2008).
- 677 64. A. Sengupta, W. K. Liu, Y. G. Yeung, D. C. Y. Yeung, A. R. Frackelton, E. R. Stanley, Identification and  
678 subcellular localization of proteins that are rapidly phosphorylated in tyrosine in response to colony-stimulating  
679 factor 1. *Proceedings of the National Academy of Sciences* **85**, 8062–8066 (1988).
- 680 65. N. Lachmann, M. Ackermann, E. Frenzel, S. Liebhaber, S. Brenig, C. Happle, D. Hoffmann, O. Klimenkova,  
681 D. Lüttge, T. Buchegger, M. P. Kühnel, A. Schambach, S. Janciauskiene, C. Figueiredo, G. Hansen, J. Skokowa, T.  
682 Moritz, Stem Cell Reports Resource Large-Scale Hematopoietic Differentiation of Human Induced Pluripotent Stem  
683 Cells Provides Granulocytes or Macrophages for Cell Replacement Therapies. *Stem Cell Reports* **4**, 282–296 (2015).

- 684 66. L. Ziegler-Heitbrock, P. Ancuta, S. Crowe, M. Dalod, V. Grau, D. N. Hart, P. J. M. Leenen, Y. J. Liu, G.  
685 MacPherson, G. J. Randolph, J. Scherberich, J. Schmitz, K. Shortman, S. Sozzani, H. Strobl, M. Zembala, J. M.  
686 Austyn, M. B. Lutz, Nomenclature of monocytes and dendritic cells in blood. *Blood* **116**, e74–e80 (2010).
- 687 67. B. Grzywacz, N. Kataria, N. Kataria, B. R. Blazar, J. S. Miller, M. R. Verneris, Natural killer–cell differentiation  
688 by myeloid progenitors. *Blood* **117**, 3548–3558 (2011).
- 689 68. K. A. Alexander, R. Flynn, K. E. Lineburg, R. D. Kuns, B. E. Teal, S. D. Olver, M. Lor, N. C. Raffelt, M.  
690 Koyama, L. Leveque, L. le Texier, M. Melino, K. A. Markey, A. Varelias, C. Engwerda, J. S. Serody, B. Janela, F.  
691 Ginhoux, A. D. Clouston, B. R. Blazar, G. R. Hill, K. P. A. MacDonald, CSF-1-dependant donor-derived  
692 macrophages mediate chronic graft-versus-host disease. *Journal of Clinical Investigation* **124**, 4266–4280 (2014).
- 693 69. F. Kimura, K. Sato, H. Akiyama, H. Sao, S. Okamoto, N. Kobayashi, M. Hara, K. Kawa, K. Motoyoshi, M-CSF  
694 attenuates severity of chronic GVHD after unrelated BMT. *Bone Marrow Transplant* **47**, 426–429 (2012).
- 695 70. D. Hashimoto, A. Chow, M. Greter, Y. Saenger, W. H. Kwan, M. Leboeuf, F. Ginhoux, J. C. Ochando, Y.  
696 Kunisaki, N. van Rooijen, C. Liu, T. Teshima, P. S. Heeger, E. R. Stanley, P. S. Frenette, M. Merad, Pretransplant  
697 CSF-1 therapy expands recipient macrophages and ameliorates GVHD after allogeneic hematopoietic cell  
698 transplantation. *Journal of Experimental Medicine* **208**, 1069–1082 (2011).
- 699 71. H. Y. Lai, T. Y. Chou, C. H. Tzeng, O. K. S. Lee, Cytokine profiles in various graft-versus-host disease target  
700 organs following hematopoietic stem cell transplantation. *Cell Transplant* **21**, 2033–2045 (2012).
- 701 72. P. Ljungman, P. Griffiths, C. Paya, Definitions of cytomegalovirus infection and disease in transplant recipients.  
702 *Clinical Infectious Diseases* **34**, 1094–1097 (2002).
- 703 73. J. A. Zaia, Viral Infections Associated with Bone Marrow Transplantation. *Hematol Oncol Clin North Am* **4**,  
704 603–623 (1990).
- 705 74. J. M. Goodrich, R. A. Bowden, L. Fisher, C. Keller, G. Schoch, J. D. Meyers†, Ganciclovir Prophylaxis To  
706 Prevent Cytomegalovirus Disease after Allogeneic Marrow Transplant. *Ann Intern Med* **118**, 173–178 (1993).
- 707 75. M. Boeckh, T. A. Gooley, D. Myerson, T. Cunningham, G. Schoch, R. A. Bowden, Cytomegalovirus pp65  
708 antigenemia-guided early treatment with ganciclovir versus ganciclovir at engraftment after allogeneic marrow  
709 transplantation: A randomized double-blind study. *Blood* **88**, 4063–4071 (1996).
- 710 76. B. Salzberger, R. A. Bowden, R. C. Hackman, C. Davis, M. Boeckh, Neutropenia in Allogeneic Marrow  
711 Transplant Recipients Receiving Ganciclovir for Prevention of Cytomegalovirus Disease: Risk Factors and  
712 Outcome. *Blood* **90**, 2502–2508 (1997).
- 713 77. J. K. de Kanter, F. Peci, E. Bertrums, A. Rosendahl Huber, A. van Leeuwen, M. J. van Roosmalen, F. Manders,  
714 M. Verheul, R. Oka, A. M. Brandsma, M. Bierings, M. Belderbos, R. van Boxtel, Antiviral treatment causes a  
715 unique mutational signature in cancers of transplantation recipients. *Cell Stem Cell* **28**, 1726–1739.e6 (2021).
- 716 78. M. M. Brinkmann, F. Dağ, H. Hengel, M. Messerle, U. Kalinke, L. Čičin-Šain, Cytomegalovirus immune  
717 evasion of myeloid lineage cells. *Med Microbiol Immunol* **204**, 367–382 (2015).
- 718 79. L. K. Hanson, J. S. Slater, Z. Karabekian, H. W. Virgin, C. A. Biron, M. C. Ruzek, N. van Rooijen, R. P.  
719 Ciavarra, R. M. Stenberg, A. E. Campbell, Replication of Murine Cytomegalovirus in Differentiated Macrophages  
720 as a Determinant of Viral Pathogenesis. *J Virol* **73**, 5970–5980 (1999).
- 721 80. K. L. Hokeness, W. A. Kuziel, C. A. Biron, T. P. Salazar-Mather, Monocyte Chemoattractant Protein-1 and  
722 CCR2 Interactions Are Required for IFN- $\alpha/\beta$ -Induced Inflammatory Responses and Antiviral Defense in Liver. *The*  
723 *Journal of Immunology* **174**, 1549–1556 (2005).
- 724 81. L. P. Daley-Bauer, G. M. Wynn, E. S. Mocarski, Cytomegalovirus impairs antiviral CD8+ T cell immunity by  
725 recruiting inflammatory monocytes. *Immunity* **37**, 122–133 (2012).
- 726 82. L. M. Smith, J. N. Tonkin, M. A. Lawson, G. R. Shellam, Isolates of cytomegalovirus (CMV) from the black rat  
727 *Rattus rattus* form a distinct group of rat CMV. *Journal of General Virology* **85**, 1313–1317 (2004).
- 728 83. T. P. Salazar-Mather, C. A. Lewis, C. A. Biron, Type I interferons regulate inflammatory cell trafficking and  
729 macrophage inflammatory protein 1 $\alpha$  delivery to the liver. *Journal of Clinical Investigation* **110**, 321–330 (2002).
- 730 84. M. J. Crane, K. L. Hokeness-Antonelli, T. P. Salazar-Mather, Regulation of Inflammatory  
731 Monocyte/Macrophage Recruitment from the Bone Marrow during Murine Cytomegalovirus Infection: Role for  
732 Type I Interferons in Localized Induction of CCR2 Ligands. *The Journal of Immunology* **183**, 2810–2817 (2009).
- 733 85. J. Subburayalu, S. Dolf, S. Xu, M. Sun, M. Lindemann, A. Heinold, F. M. Heinemann, J. W. C. Tervaert, U.  
734 Eisenberger, J. Korth, A. Brinkhoff, A. Kribben, O. Witzke, B. Wilde, Characterization of follicular T helper cells  
735 and donor-specific T helper cells in renal transplant patients with de novo donor-specific HLA-antibodies. *Clinical*  
736 *Immunology* **226** (2021), doi:10.1016/j.clim.2021.108698.
- 737 86. K. R. Bashant, A. Vassallo, C. Herold, R. Berner, L. Menschner, J. Subburayalu, M. J. Kaplan, C. Summers, J.  
738 Guck, E. R. Chilvers, N. Toepfner, Real-time deformability cytometry reveals sequential contraction and expansion  
739 during neutrophil priming. *J Leukoc Biol* **105**, 1143–1153 (2019).



740 87. D. Bryder, D. J. Rossi, I. L. Weissman, Hematopoietic stem cells: the paradigmatic tissue-specific stem cell. *Am*  
741 *J Pathol* **169**, 338–346 (2006).  
742 88. M. C. Costanzo, M. Creegan, K. G. Lal, M. A. Eller, OMIP-027: Functional analysis of human natural killer  
743 cells. *Cytometry Part A* **87**, 803–805 (2015).  
744 89. E. L. Soucie, Z. Weng, L. Geirsdóttir, K. Molawi, J. Maurizio, R. Fenouil, N. Mossadegh-Keller, G. Gimenez, L.  
745 Vanhille, M. Beniazza, J. Favret, C. Berruyer, P. Perrin, N. Hacohen, J. C. Andrau, P. Ferrier, P. Dubreuil, A.  
746 Sidow, M. H. Sieweke, Lineage-specific enhancers activate self-renewal genes in macrophages and embryonic stem  
747 cells. *Science (1979)* **351** (2016), doi:10.1126/science.aad5510.

748

#### 749 **Acknowledgments:**

750 We thank L. Chasson and Caroline Laprie for histology, L. Razafindramanana for animal  
751 handling, M. Barad, A. Zouine and S. Bigot for cytometry support, J. Maurizio and Michaela  
752 Burkon for assistance in figure preparation. We thank Martin Bornhäuser for critical reading and  
753 discussion of the manuscript. We acknowledge the Dresden Department of Transfusion Medicine  
754 (Kristina Hölig) and the Dresden Stem Cell Laboratory (Manja Wobus and Malte von Bonin) for  
755 providing samples of G-CSF-mobilized PBMCs for the human *ex vivo* experiments. We  
756 appreciate the support of human donors of whom informed consent was obtained prior to the *in*  
757 *vitro* assays. We thank Philippe Pierre for *IFNARI*-KO mice. A visual abstract, Fig. 1A, Fig. 2B,  
758 fig. S4A, and fig. S5A were created and exported with BioRender.com under a paid subscription.

#### 759 **Funding:**

760 This study was supported by  
761 Institutional grants from TU Dresden,  
762 Institut National de la Santé et de la Recherche Médicale,  
763 Centre National de la Recherche Scientifique and Aix-Marseille University and grants from  
764 Fondation pour la Recherche Médicale (DEQ. 20110421320) to M.H.S.,  
765 ‘Agence Nationale de la Recherche’ (ANR-11-BSV3-026-01, ANR-17-CE15-0007-01 and  
766 ANR-18-CE12-0019-03) to M.H.S.,  
767 INCa (13-10/405/AB-LC-HS) to M.H.S.,  
768 Fondation ARC pour la Recherche sur le Cancer (PGA1 RF20170205515) to M.H.S.,  
769 European Research Council (ERC) under the European Union’s Horizon 2020 research and  
770 innovation program (grant agreement number 695093 MacAge) to M.H.S.  
771 The funders of the study had no role in the study design, data collection, data analysis, data  
772 interpretation, or writing of the manuscript. M.H.S. is an Alexander von Humboldt Professor at  
773 the TU Dresden. P.K.K. was partially funded by SATT Sud. J.S. is funded by the Deutsche  
774 Forschungsgemeinschaft (Clinician Scientist position, SU 1360/1-1). The authors declare no  
775 competing financial interests.

#### 776 **Author contributions:**

777 P.K.K., J.S., M.D. and M.H.S. designed experiments, P.K.K. performed most experiments, C.C.  
778 contributed to initial setup and analysis of experiments. P.K.K., J.S., M.D. and M.H.S. analyzed  
779 data; C.C., J.I., and E.T. produced MCMV and helped with infection standardization; B.d.L. and  
780 M.C. contributed to processing samples for HSPC transplantation; B.d.L. tested virus and  
781 performed allogeneic transplantations, J.S. and J.N performed human cell experiments; W.C., S.S.,  
782 G.B., N.M.K. and C.H designed and performed gene-expression experiments; G.M., R.B. and  
783 M.F.G provided baculo-virus-produced murine M-CSF; M.D. and S.S. helped with critical  
784 reading of the manuscript; M.H.S. conceived the project, P.K.K., J.S. and M.H.S planned and

785 managed the project, and wrote the manuscript; all authors reviewed and agreed with the final  
786 version of the manuscript.

787  
788 **Competing interests:**

789 The authors declare the following potential conflict of interests: Michael Sieweke is a patent  
790 holder of WO2014167018A1 (Use of M-CSF for preventing or treating myeloid cytopenia and  
791 related complications).

792  
793 **Data and materials availability:**

794 For original data, please contact [michael.sieweke@tu-dresden.de](mailto:michael.sieweke@tu-dresden.de).

795



796 **Figures**

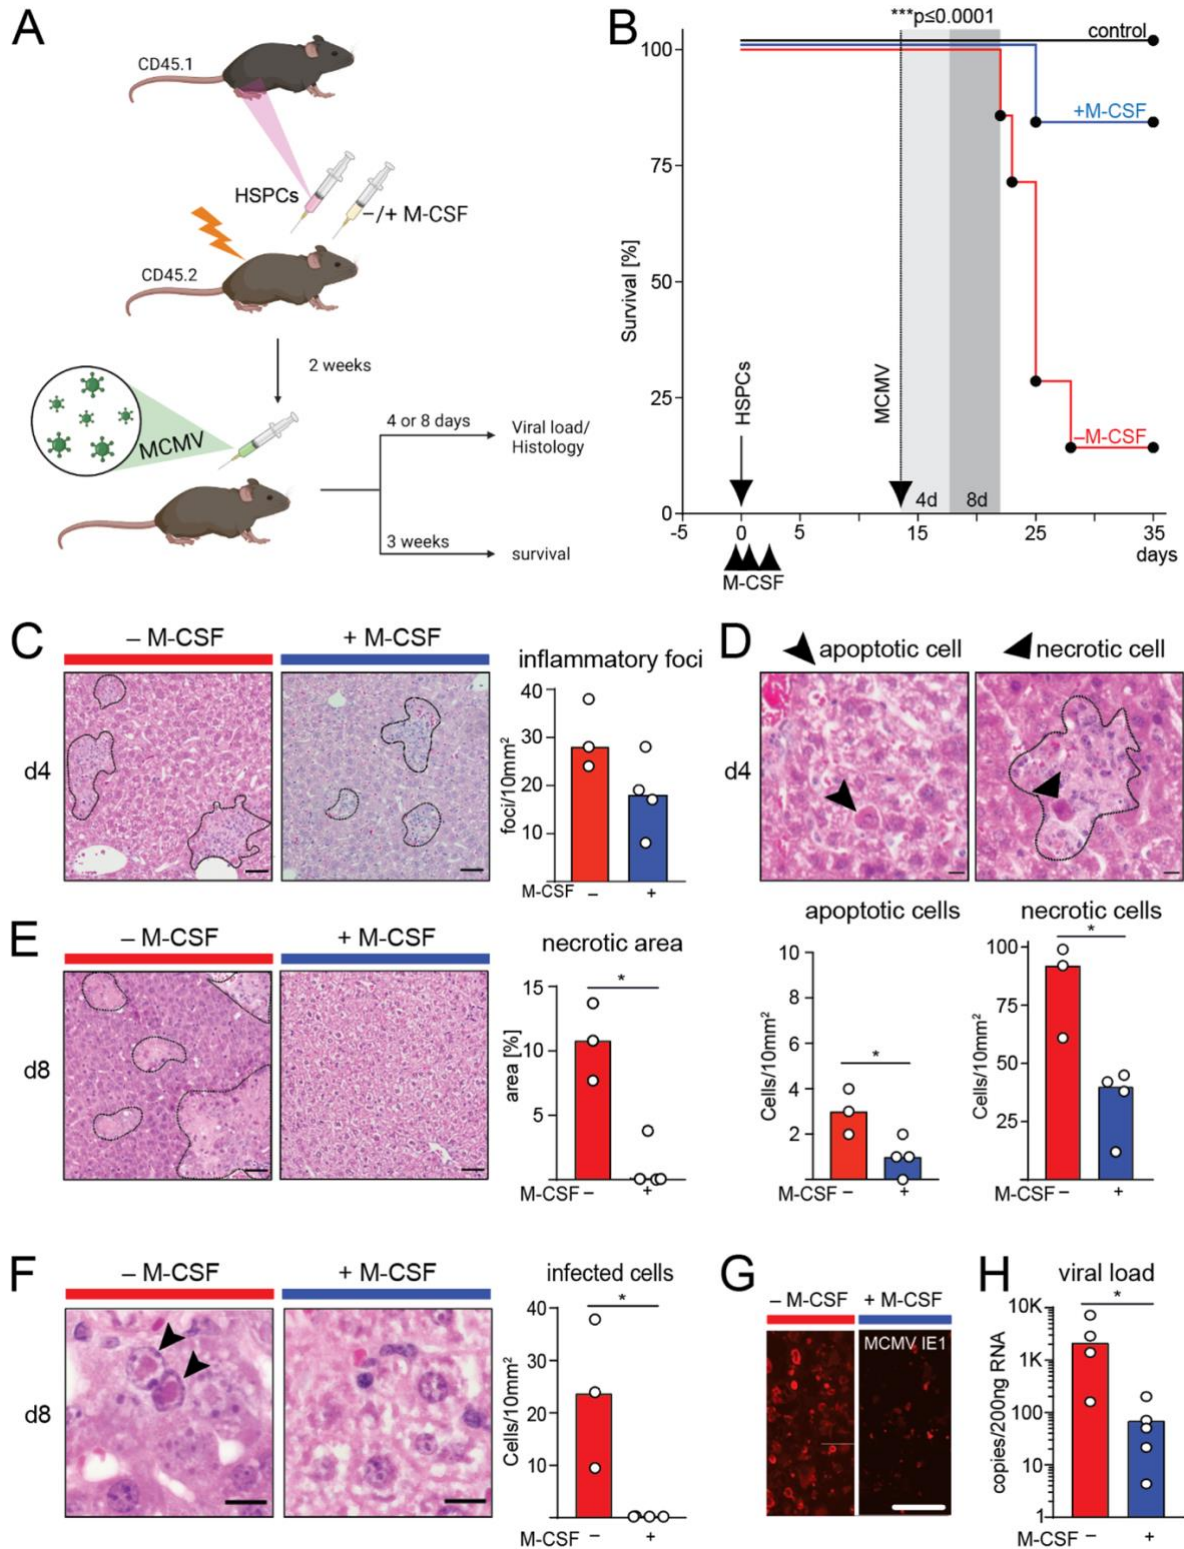

797 **Fig. 1. M-CSF protects HSPC recipients from CMV viremia and mortality.** (A) Leukopenia  
 798 model to study MCMV viremia. (B) Survival of mice after HSPC transplantation (arrow), MCMV  
 799

800 infection (stippled arrow) and treatment (arrowheads) with control PBS (-M-CSF; n = 12) or three  
801 doses of 10 $\mu$ g mouse recombinant M-CSF (+M-CSF; n = 11). Transplanted, uninfected mice (n =  
802 5) are shown as control. (C) Histopathology of MCMV-induced hepatitis. Assessment of  
803 inflammatory foci 4 days after infection of transplanted mice treated with M-CSF or control PBS.  
804 Example of hematoxylin and eosin (H&E)-staining and inflammatory foci (n = 4). (D)  
805 Histopathology of MCMV-induced hepatitis. Apoptotic (arrowheads) and necrotic (arrows)  
806 hepatocytes and quantification as median cell numbers per area (n = 4). (E) Histopathology of  
807 MCMV-induced hepatitis. Assessment of necrotic area 8 days after infection of transplanted mice  
808 (H&E). Percentage of affected areas (n = 4). (F) Histological analysis of infected hepatocytes  
809 (H&E); quantification per area (n = 4). (G) Immunofluorescence staining of MCMV E1 protein.  
810 (H) RT-qPCR-based quantitation of viral mRNA per 200 ng RNA (n = 5). \*\*\* $P < 0.0001$  by  
811 Mantel-Cox test (B). \* $P < 0.05$  by two-tailed Mann-Whitney  $U$ -test (C-G). All data are  
812 representative of at least two independent experiments.  
813

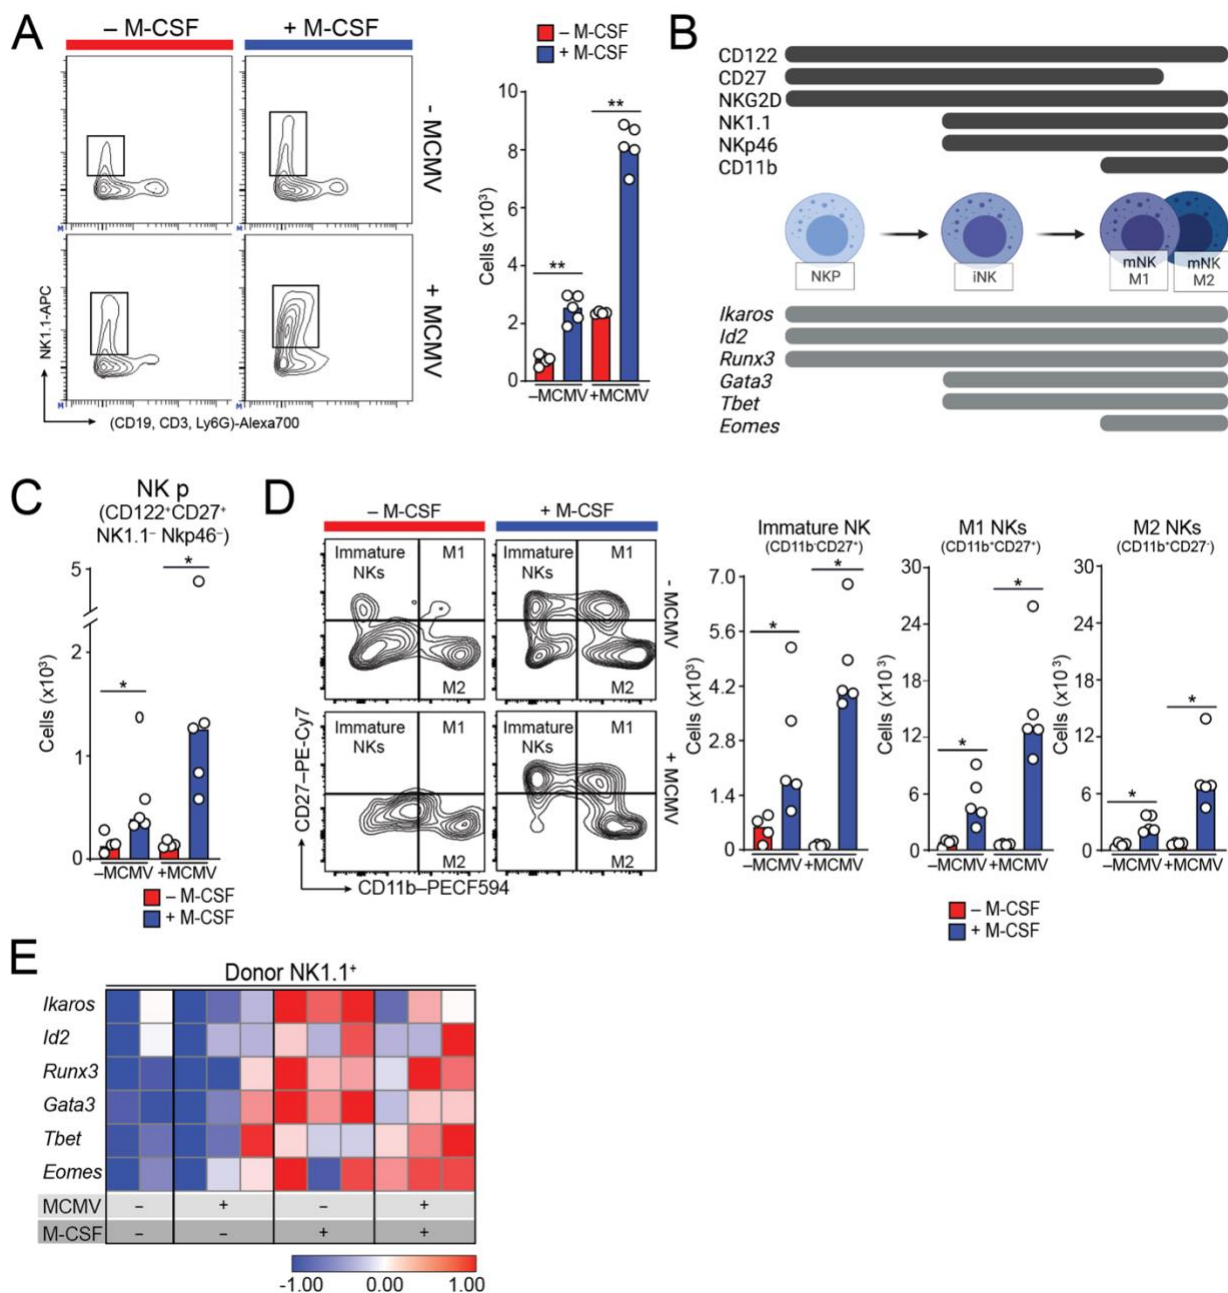

814  
 815 **Fig. 2. M-CSF treatment increases NK cell production, differentiation, and activation.**  
 816 Experimental set-up as in Fig. 1A. Analysis of spleen NK cell populations. Mice were MCMV- or  
 817 mock-infected (PBS control) 14 days after HCT ( $\pm$  M-CSF support as indicated in Fig. 1A).  
 818 Analysis was performed 1.5 days after MCMV or mock infection. (A) FACS examples and median  
 819 of absolute number of total NK cells (CD19<sup>+</sup>CD3<sup>+</sup>Ly6G<sup>+</sup>NK1.1<sup>+</sup>) are shown. (B) Markers specific  
 820 to differentiation and maturation stages of NK cells used in this analysis are indicated. (C) Median  
 821 of absolute number of donor-derived NK progenitor cells (CD122<sup>+</sup>CD27<sup>+</sup>NK1.1<sup>-</sup>Nkp46<sup>-</sup>CD45.1<sup>+</sup>)  
 822 are displayed. (D) FACS examples and median of absolute numbers of donor-derived immature  
 823 NK cells, donor-derived M1 (CD11b<sup>+</sup>CD27<sup>+</sup>) and M2 NK cells (CD11b<sup>+</sup>CD27<sup>-</sup>) are shown. (E)  
 824 Gene expression analysis of transcription factors expressed by NK cells in FACS-sorted, donor-  
 825 derived NK1.1<sup>+</sup> NK cells (definitions of Fig. 2A) by nanofluidic Fluidigm array real-time PCR.

826 \* $P < 0.05$ , \*\* $P < 0.01$  by two-tailed Mann-Whitney  $U$ -test. All data are representative of two  
827 independent experiments.  
828

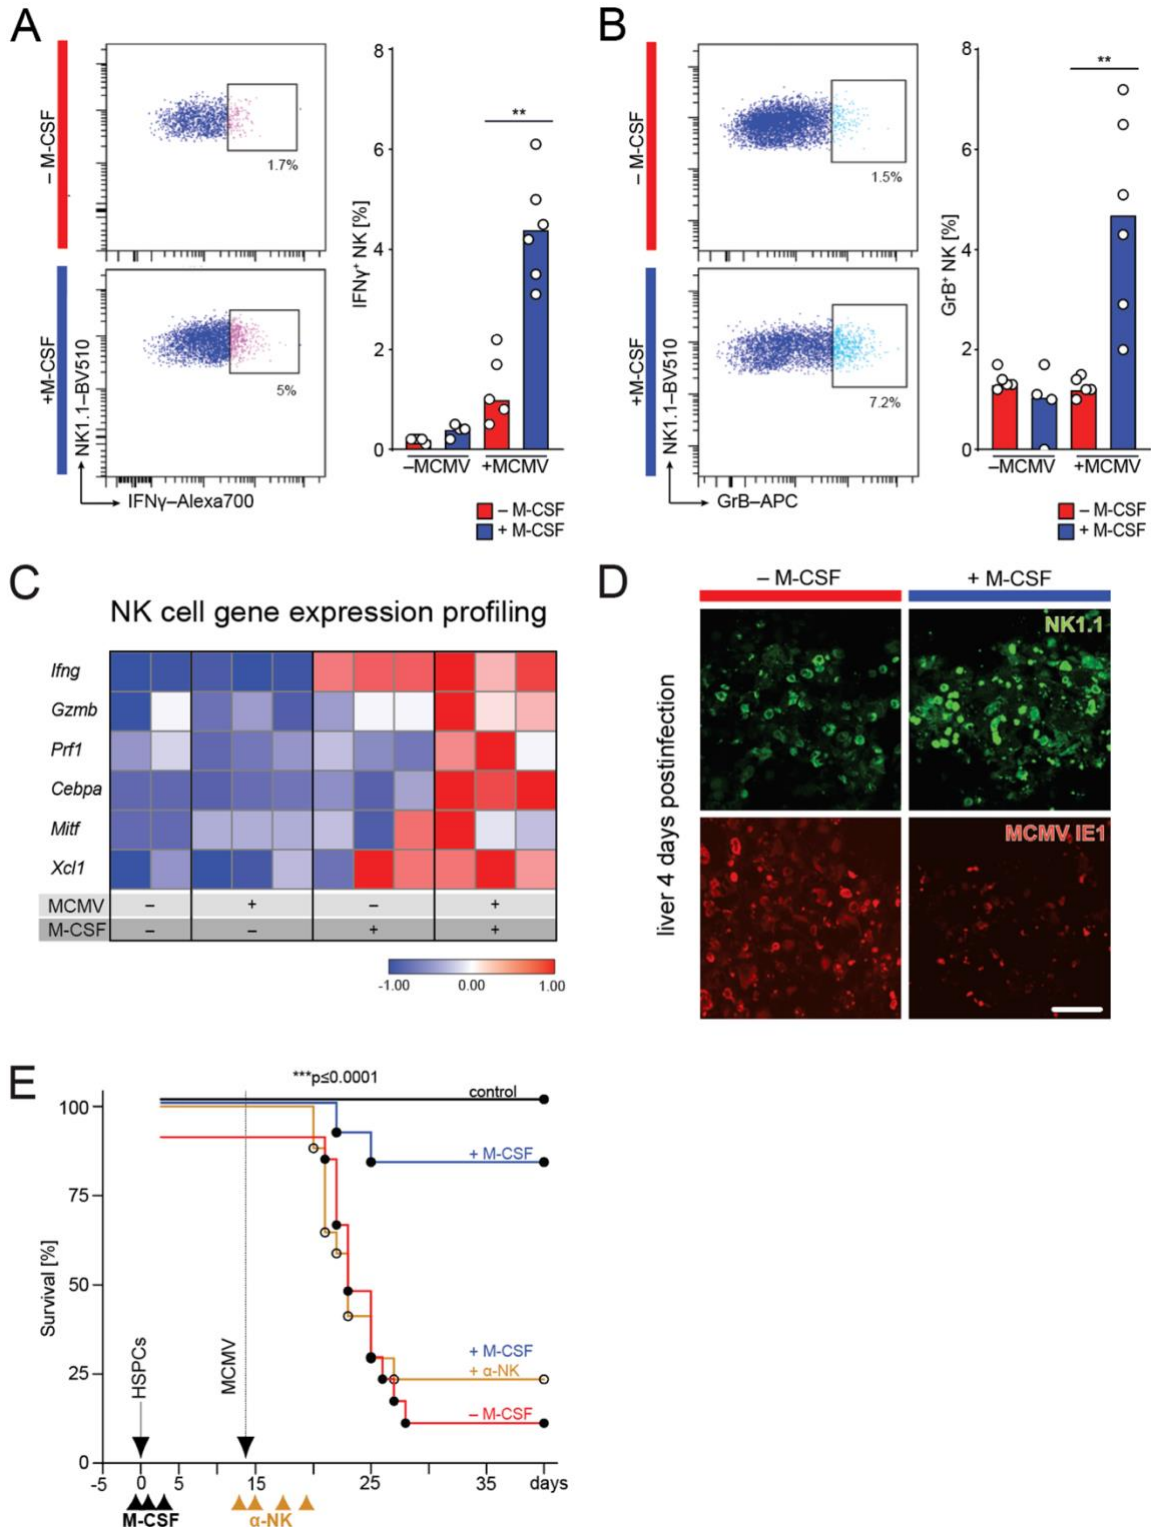

829

830

831 **Fig. 3. NK cell activity is required for the antiviral effect of M-CSF.** Workflow as indicated in

832 Fig. 1A. Analysis was performed 1.5 days (or 4 days in D) after MCMV or mock infection. (A)

833 NK cell activity in the spleen. FACS examples and median of percentage of donor-derived NK1.1<sup>+</sup>

834 NK cells producing IFN $\gamma$ . (B) FACS examples and median of percentage of donor-derived NK1.1<sup>+</sup>

835 NK cells producing GrB. (C) Gene expression analysis of activation and maturation-related factors

835 in FACS-sorted, donor-derived NK1.1<sup>+</sup> NK cells by RT-qPCR. (D) Immunofluorescence analyses  
836 with anti-NK1.1 and anti-MCMV IE1 antibodies in liver of HSPC-transplanted and M-CSF- or  
837 control PBS-treated mice 4 days after MCMV infection. (E) Assessment of the requirements for  
838 M-CSF-mediated antiviral NK cell response. Survival of PBS control (-M-CSF, n = 15), M-CSF-  
839 and control IgG-treated (n = 12), M-CSF and anti-NK1.1-treated (n = 17) or transplanted,  
840 uninfected control mice (n = 4). Mice underwent HSPC-transplantation (solid arrow), control PBS  
841 or M-CSF-treatment (black arrowheads) and were infected with MCMV (stippled arrow) as shown  
842 in Fig.1A-B. Repeated treatment with anti-NK1.1 antibody (or control IgG) was done before and  
843 after infection (d-1, d1, d3, d5). \*\**P* < 0.01 by two-tailed Mann-Whitney *U*-test (A, B), \*\*\**P* <  
844 0.0001 by Mantel-Cox test (E). All data are representative of two independent experiments.  
845



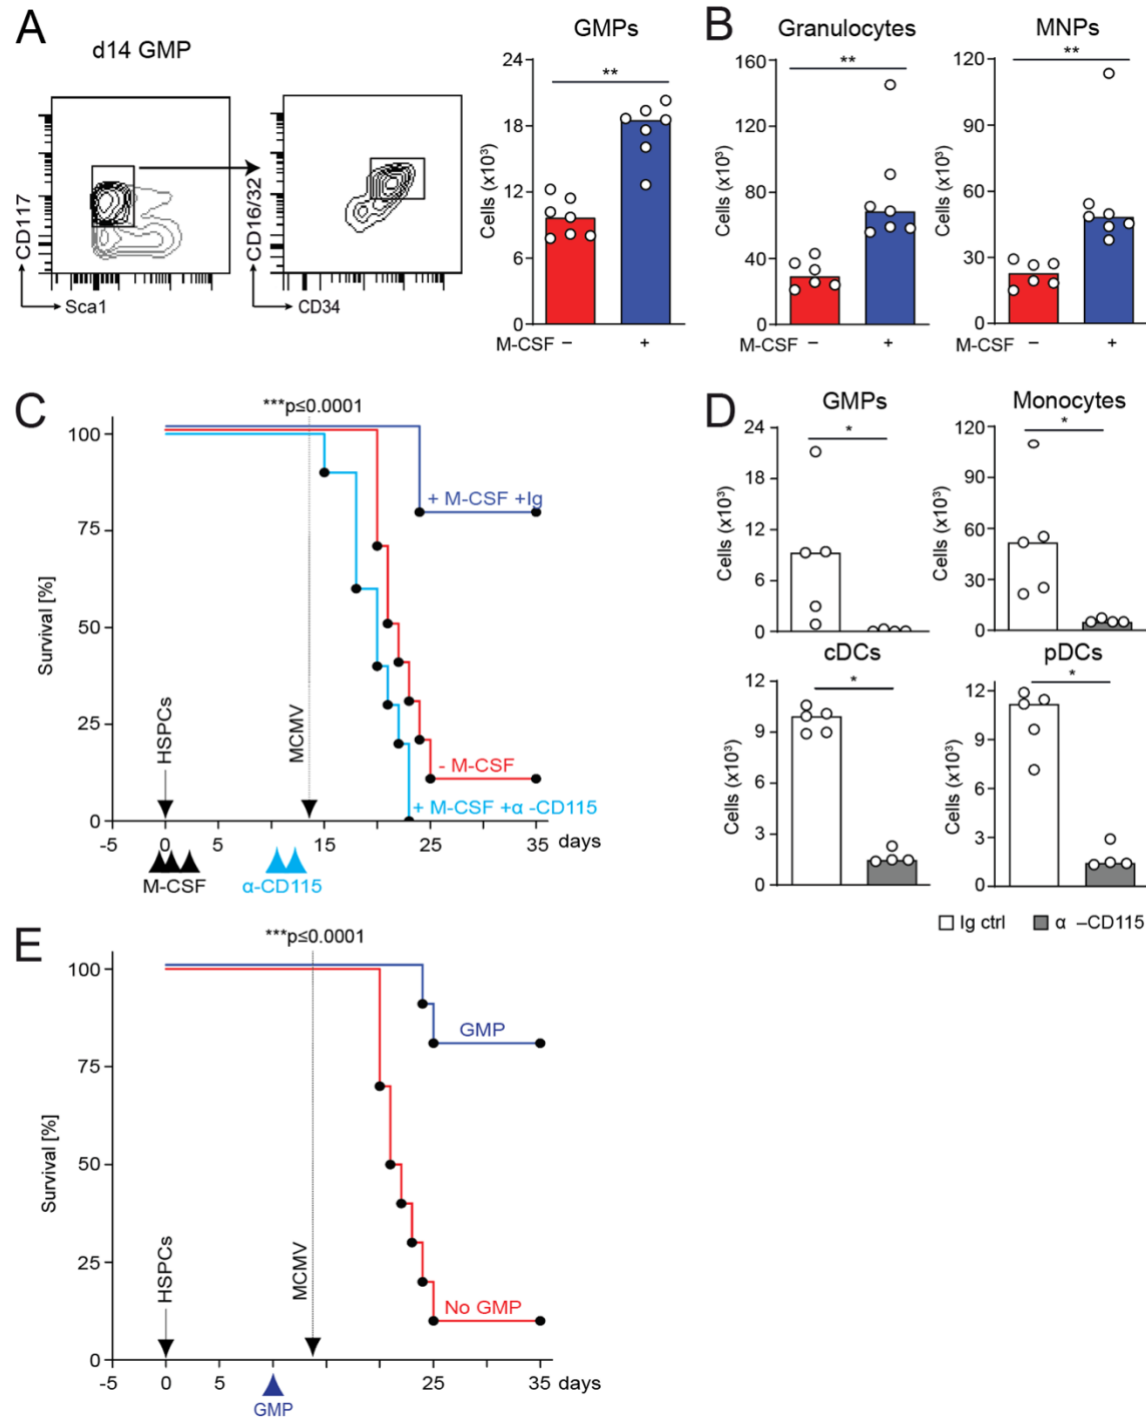

846  
 847 **Fig. 4. M-CSF-induced myelopoiesis is required for its antiviral effect.** (A) Splenic GMPs of  
 848 control or M-CSF-treated, uninfected mice 14 days after HCT. (B) Splenic granulocytes  
 849 (Ly6G<sup>+</sup>CD11b<sup>+</sup>) and mononuclear phagocytes (Ly6G<sup>+</sup>CD11b<sup>+</sup>) of control or M-CSF-treated,  
 850 uninfected recipient mice 14 days after transplantation. (C) Analysis of M-CSF-dependent myeloid  
 851 cells for its antiviral effect. Survival curve of MCMV-infected and control (n = 10), M-CSF and  
 852 IgG control Ab-treated (n = 9) or M-CSF and anti-CD115 antibody-treated mice (n = 10). After  
 853 HCT (solid arrow), vehicle control or M-CSF applied (black arrowheads). Infection with MCMV  
 854 (stippled arrow) as shown in Fig. 1A-B and treatment twice with anti-CD115 antibody before

855 infection (d-2, d-1). (D) Splenic GMPs, monocytes, cDCs and pDCs of uninfected Ig control- or  
856 anti-CD115 antibody-treated recipient mice 48 hours after first treatment. (E) GMP-derived  
857 myeloid cells for antiviral activity. GMP transplantation with 50,000 cells on day 10 after HCT.  
858 Survival of MCMV-infected control (no GMP, n = 10) or GMP-transplanted mice (GMP, n = 10).  
859 Mice underwent HCT (HSPCs) (solid arrow), were infected with MCMV (stippled arrow) as  
860 described in Fig. 1A-B and GMP-transplanted 10 days after HCT. \*\*\* $P < 0.0001$  by Mantel-Cox  
861 test (C, E), \* $P < 0.05$ , \*\* $P < 0.01$  by Mann-Whitney  $U$ -test. All data are representative of two  
862 independent experiments.  
863

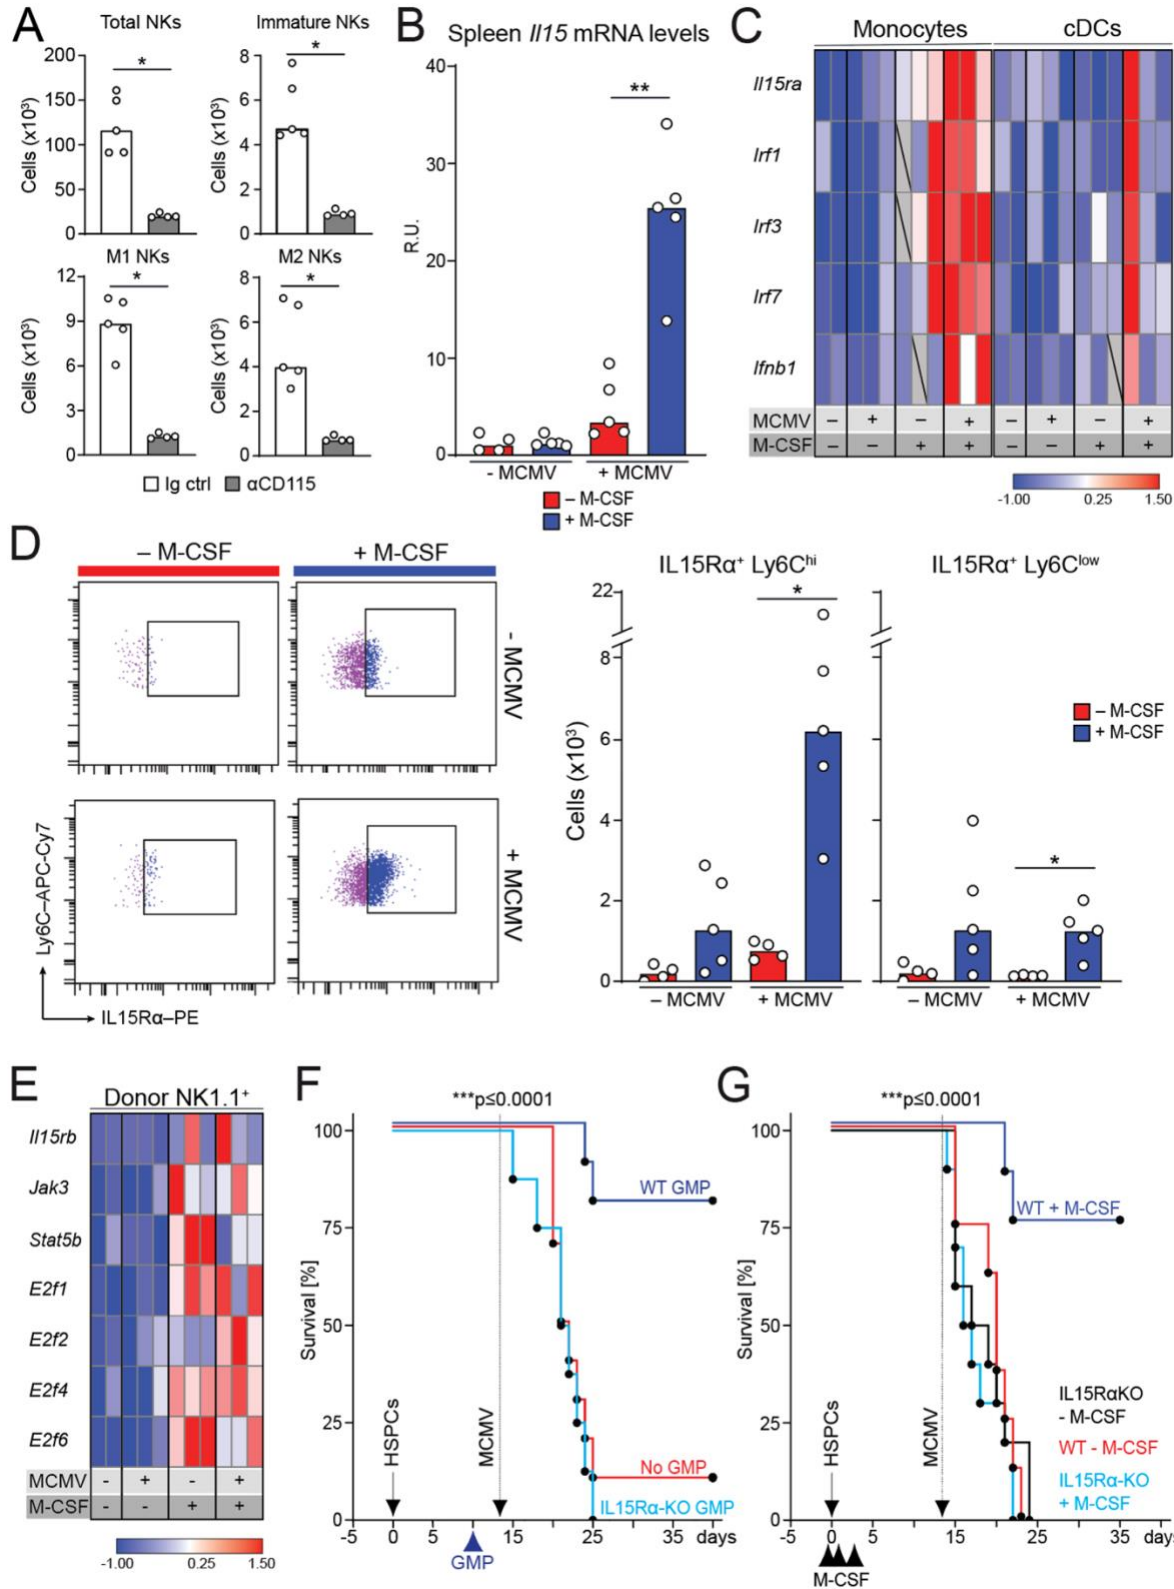

864  
865 **Fig. 5. Myeloid IL-15 trans-presentation is required for the antiviral activity of M-CSF.** (A)  
866 Splenic NK1.1<sup>+</sup>, immature and M1/M2 NK cells of uninfected control or anti-CD115-treated mice  
867 two days after depletion and 14 days after HCT and M-CSF treatment. (B) Mice were MCMV- or

868 mock-infected 14 days after HCT. Analysis 1.5 days after infection (B-E). Splenic *Il15* mRNA  
869 levels (RT-qPCR). (C) FACS-sorted, donor-derived splenic monocytes and cDCs assessed by  
870 Fluidigm. (D) Ly6C<sup>hi</sup> monocytes (left), splenic IL15R $\alpha$ -expressing, donor-derived Ly6C<sup>hi</sup> or  
871 Ly6C<sup>low</sup> monocytes (right). (E) Gene expression analysis of splenic donor-derived NK cells by  
872 Fluidigm. (F) 50,000 GMPs transplanted on day 10 after HCT. Survival of MCMV-infected  
873 control (no GMP, n = 10), WT GMP (n = 10) or *IL15R $\alpha$ -KO* GMP-transplanted mice (*IL15R $\alpha$ -*  
874 *KO* GMP, n = 9). HCT (solid arrow), MCMV infection (stippled) and GMP-transplantation  
875 (arrowhead). (G) Survival of WT HCT, control-treated (n = 8), WT HCT, M-CSF-treated (n = 8)  
876 or *IL15R $\alpha$ -KO* HCT, control-treated (n = 10) or *IL15R $\alpha$ -KO* HCT, M-CSF-treated mice (n = 10).  
877 Mice transplanted with WT control HSPCs or *IL15R $\alpha$ -KO* HSPCs (solid arrow), control or M-  
878 CSF treatment (black arrowheads), and MCMV infection (stippled). \**P* < 0.05; \*\**P* < 0.01 by two-  
879 tailed Mann-Whitney *U*-test (A-D). \*\*\**P* < 0.0001 by Mantel-Cox test (F-G). All data are  
880 representative of two independent experiments.  
881

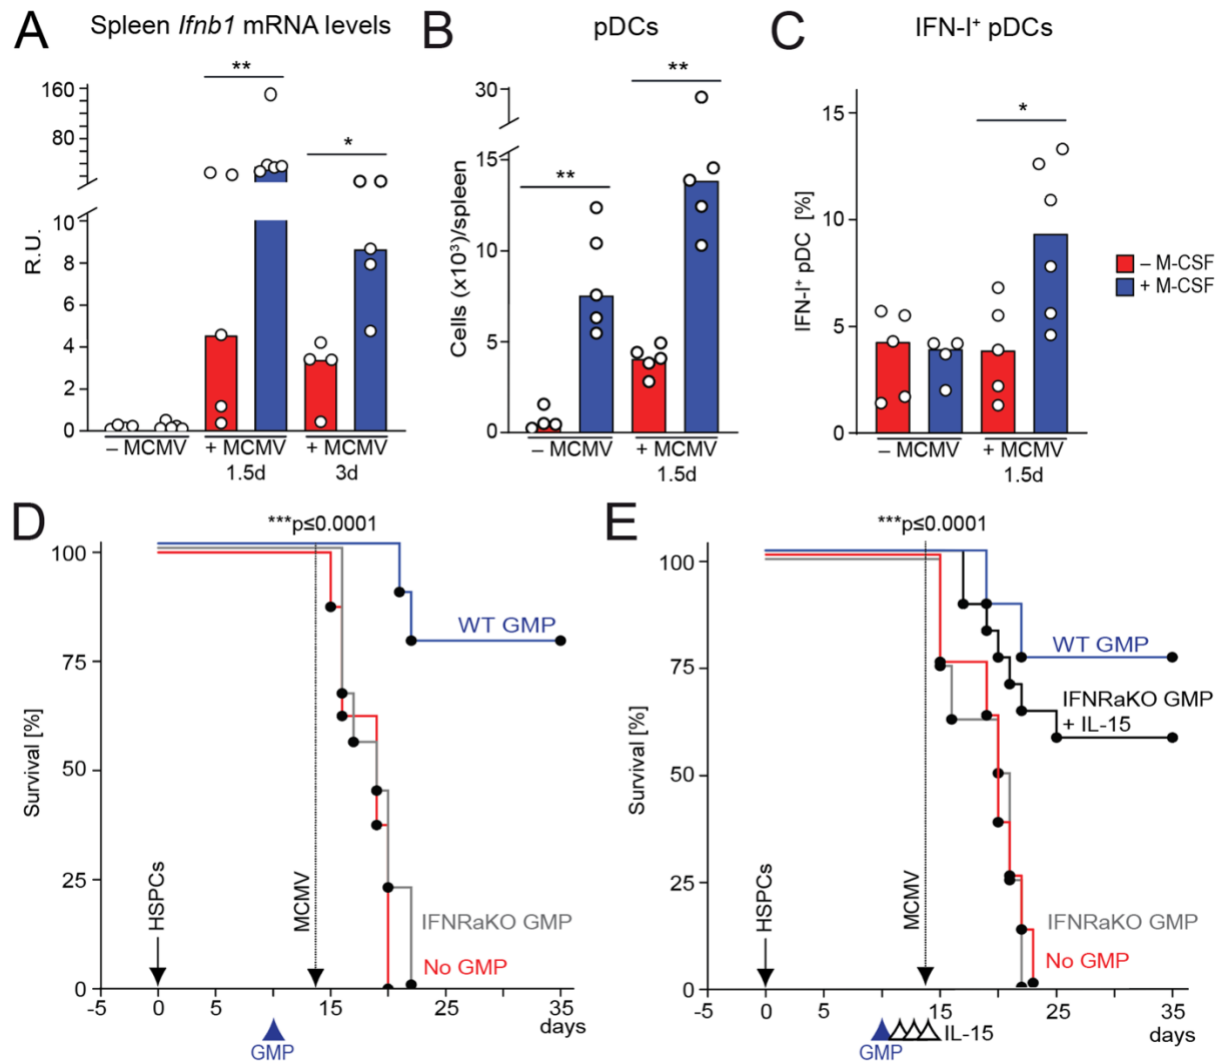

882  
 883 **Fig. 6. M-CSF-induced I-IFN production stimulates IL-15-dependent antiviral effects.**  
 884 MCMV- or mock-infection 14 days after HCT. Analysis performed 1.5 days (or 3 days in A) after.  
 885 (A) Splenic *Ifnb1* mRNA levels of control or M-CSF-treated mice (RT-qPCR). (B) Donor-derived  
 886 splenic Lin<sup>-</sup>CD11c<sup>lo</sup>BST2<sup>hi</sup> pDCs. (C) %IFN- $\beta$ <sup>+</sup> pDCs. (D) Survival of MCMV-infected, no GMP  
 887 control (n = 8), WT GMP (n = 9) or *Ifnar1*-KO GMP-transplanted mice (n = 9). HCT (solid arrow),  
 888 MCMV infection (stippled) and GMP-transplantation 10 days after HCT (arrowhead).  $P < 0.0001$   
 889 by Mantel-Cox test. (E) Survival of MCMV-infected, no GMP control (n = 8), WT GMP (n = 8)  
 890 or *Ifnar1*-KO GMP-transplanted mice without (n = 8) or with IL-15 rescue treatment (n = 16).  
 891 HCT (solid arrow), MCMV infection (stippled), GMP transplantation 10 days after HCT (blue  
 892 arrowhead) and treatment with 0.5  $\mu$ g IL-15 or control on days 12, 13 and 14 (black arrowheads).  
 893  $**P < 0.01$ ,  $*P < 0.05$  by Mann-Whitney *U*-test (A-D).  $***P < 0.0001$  by Mantel-Cox test (E-F).  
 894 All data are representative of two independent experiments.

895

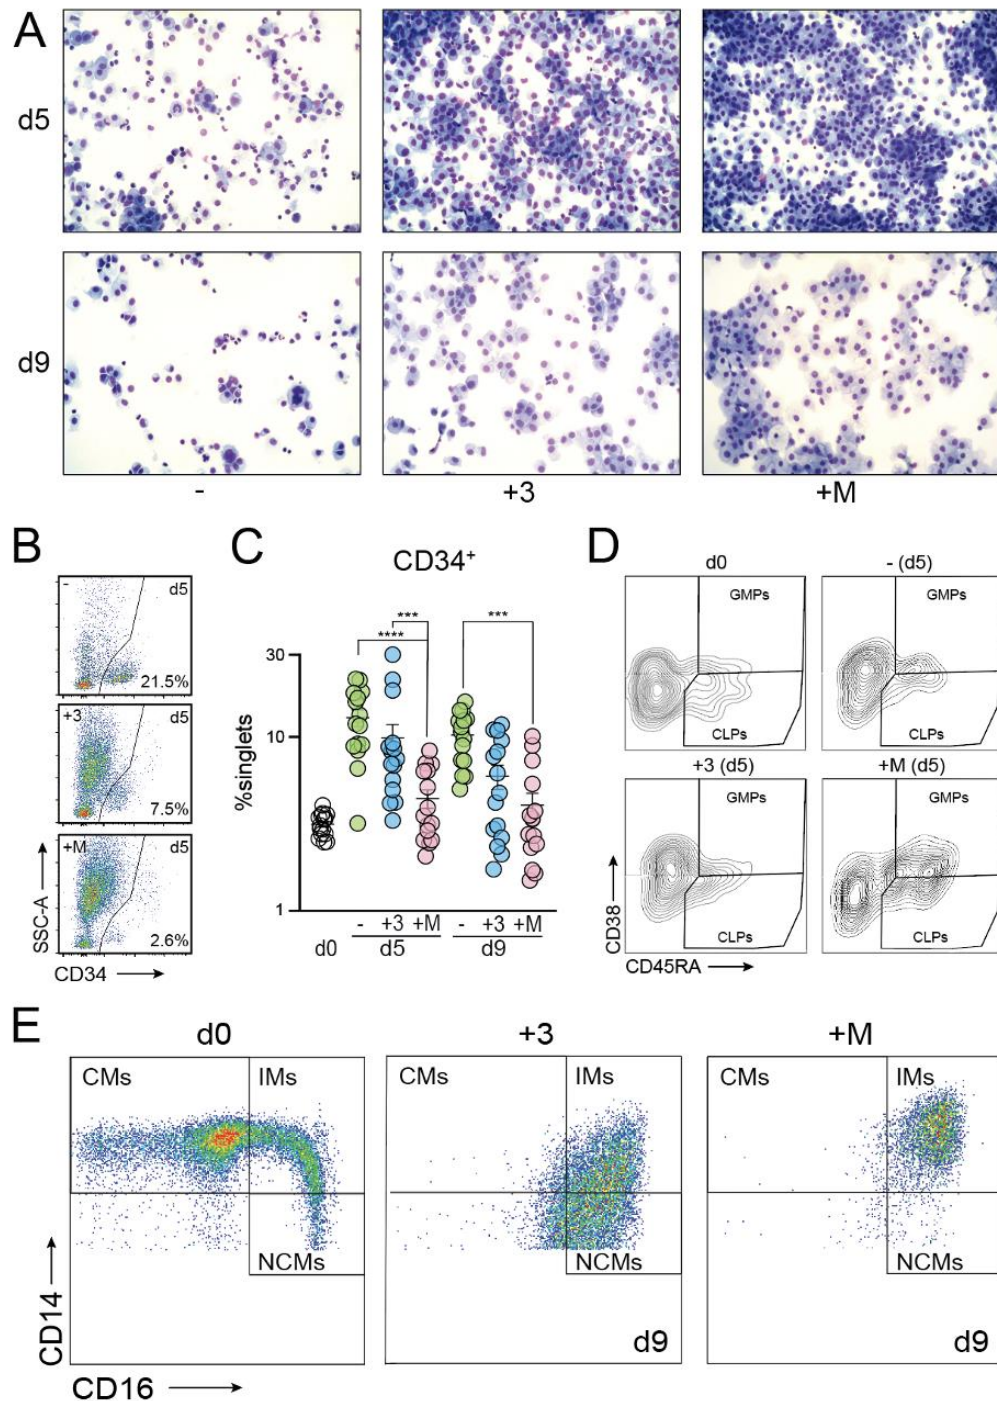

896  
 897 **Fig. 7. M-CSF supports terminal differentiation of IMs in human G-PBMCs.** (A) Cytopins  
 898 at days 5 or 9 after *in vitro* differentiation without myelopoiesis-inducing cytokines (-), or with IL-  
 899 3 (+3) or M-CSF (+M) (modified Giemsa). (B) Contour plots five days after *in vitro* cytokine  
 900 treatment without myelopoiesis-inducing cytokines (-, top row), with IL-3 (+3, middle row) or  
 901 with M-CSF (+M, bottom row) indicating the frequency of CD34<sup>+</sup> HSPCs as compared to the total  
 902 number of live single cells analyzed. (C) Frequency of CD34<sup>+</sup> HSPCs at seeding (d0), or after *in*  
 903 *vitro* cytokine treatment without myelopoiesis-inducing cytokines (-, green circle), with IL-3 (+3,  
 904 blue circle) or with M-CSF (+M, salmon circle).



905 comprising of CLPs (CD34<sup>+</sup>CD45RA<sup>+</sup>CD38<sup>-</sup>) or GMPs (CD34<sup>+</sup>CD45RA<sup>+</sup>CD38<sup>+</sup>) upon selection  
906 from G-PBMCs (d0) or after *in vitro* cytokine treatment at day 5: without myelopoiesis-inducing  
907 cytokines (-) vs. IL-3 (+3) vs. M-CSF (+M). (E) Seeding (d0): monocytes SSC-A<sup>low</sup>CD14<sup>+</sup> (CMs  
908 by CD16/CD14 staining, left); differentiation: IMs almost exclusively with M-CSF (+M, right) vs.  
909 2/3 IMs and 1/3 NCMs with IL-3 (+3, middle) at day 9. Representative pseudocolor plots. The  
910 data are illustrated as mean ± SEM. A ratio-paired *t*-test was used. \*\*\**P* < 0.001, \*\*\*\**P* < 0.0001.  
911 All data are representative of five independent experiments.  
912

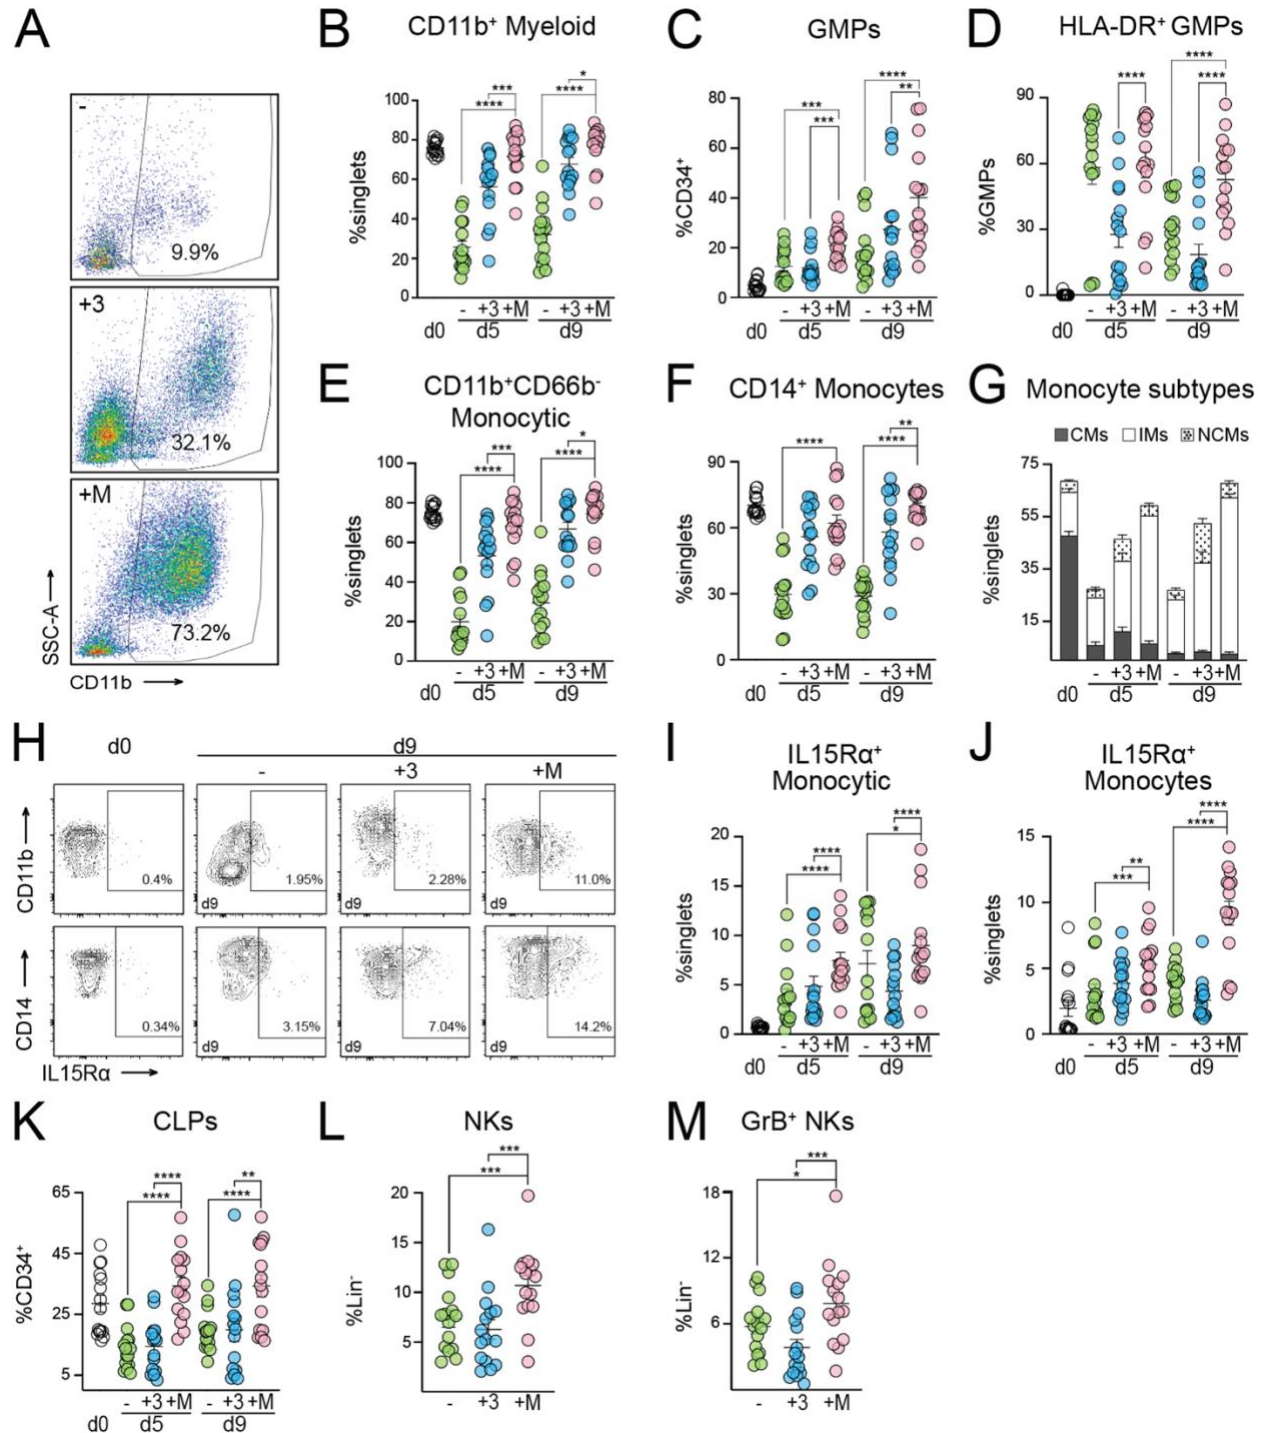

913  
 914 **Fig. 8. M-CSF-driven myeloipoiesis induces IL15R $\alpha$  expression on monocytes and supports**  
 915 **NK cell viability and cytokine competence in human G-PBMCs.** (A) Contour plots of G-  
 916 PBMCs in G-CSF-mobilized donors five days after *in vitro* cytokine treatment without  
 917 myeloipoiesis-inducing cytokines (-, top row), with IL-3 (+3, middle row) or with M-CSF (+M,  
 918 bottom row). (B) Quantification of CD11b<sup>+</sup> cells. (C) Frequency of GMPs at seeding (d0, empty  
 919 circle) or without myeloipoiesis-inducing cytokine treatment (-, green circle), with IL-3 (+3, blue  
 920 circle) or with M-CSF (+M, salmon circle). (D) Frequency of mature GMPs (HLA-DR<sup>+</sup>) at seeding

921 or -, or +3 or +M. (E) M-CSF-driven myelopoiesis. (F) M-CSF-driven monopoiesis. (G) M-CSF  
922 stimulates intermediate monocytes (IMs); CMs: classical monocytes, solid bars, IMs: white bars,  
923 NCMs: non-classical monocytes, dotted bars. (H) M-CSF drives IL15R $\alpha$  expression. Contour  
924 plots of IL15R $\alpha$  expression on CD11b<sup>+</sup> and CD14<sup>+</sup> cells. (I) Quantification of (H) on  
925 CD11b<sup>+</sup>CD66b<sup>-</sup> monocytic cells. (J) Quantification of (H) on CD14<sup>+</sup> monocytes. (K)  
926 Quantification of CLPs. (L) M-CSF supports cytokine-competent NK cells (NKs, SSC-A<sup>low</sup>Lin<sup>-</sup>  
927 CD56<sup>+</sup>CD16<sup>+</sup>) compared to - and +3. (M) M-CSF treatment enhances Granzyme B (GrB)  
928 production in NKs compared to IL-3 and -. The data are illustrated as mean  $\pm$  SEM. A ratio-paired  
929 *t*-test was used. \**P* < 0.1, \*\**P* < 0.05, \*\*\**P* < 0.01, \*\*\*\**P* < 0.001. All data are representative of five  
930 independent experiments.  
931

932 **Supplementary materials to: M-CSF induces a coordinated myeloid and NK**  
933 **cell differentiation program protecting against CMV after hematopoietic cell**  
934 **transplantation**

935

936 **Authors:** Prashanth K. Kandalla<sup>1,2†</sup>, Julien Subburayalu<sup>1,3†</sup>, Clément Cocita<sup>2,4‡</sup>, Bérengère de  
937 Laval<sup>2‡</sup>, Elena Tomasello<sup>2,4</sup>, Johanna Iacono<sup>2</sup>, Jessica Nitsche<sup>1</sup>, Magdalena Canali<sup>2</sup>, Wilfried  
938 Cathou<sup>2</sup>, Gilles Bessou<sup>2,4</sup>, Noushine Mossadegh-Keller<sup>2</sup>, Caroline Huber<sup>2</sup>, Sandrine Sarrazin<sup>1,2</sup>,  
939 Guy Mouchiroud<sup>5</sup>, Rolland Bourette<sup>6</sup>, Marie-France Grasset<sup>7</sup>, Marc Dalod<sup>2,4§</sup>, Michael H.  
940 Sieweke<sup>1,2§\*</sup>

941 **Affiliations:**

942 <sup>1</sup>Center for Regenerative Therapies Dresden (CRTD), Technical University Dresden; Dresden,  
943 01307, Germany.

944 <sup>2</sup>Aix Marseille University, CNRS, INSERM, CIML; Marseille, 13009, France.

945 <sup>3</sup>Department of Internal Medicine I, University Hospital Carl Gustav Carus Dresden; Dresden,  
946 01307, Germany.

947 <sup>4</sup>Aix-Marseille University, CNRS, INSERM, CIML, Turing Center for Living Systems;  
948 Marseille, 13009, France.

949 <sup>5</sup>Institut NeuroMyoGene, UMR CNRS 5310, INSERM; Lyon, 69008, France.

950 <sup>6</sup>Institut Pasteur de Lille, CNRS, Lille University; Lille, 59000, France.

951 <sup>7</sup>CNRS UMR5534, Lyon University; Lyon, 69008, France.

952 †These authors contributed equally to this work and share first authorship.

953 ‡These authors contributed equally to this work and share second authorship.

954 §These authors share last authorship.

955 \*Corresponding and lead author. Email: [michael.sieweke@tu-dresden.de](mailto:michael.sieweke@tu-dresden.de) (M.H.S.).

956

| Antigen    | Fluorophore | Clone    | Manufacturer  | Cat. No. |
|------------|-------------|----------|---------------|----------|
| CD45R/B220 | APC         | RA3-6B2  | Biologend     | 103211   |
| CD11b      | PerCP       | M1/70    | Biologend     | 101229   |
| CD11c      | A700        | HL3      | BD Pharmingen | 560583   |
| CD19       | APC         | 6D5      | Biologend     | 115511   |
| CD19       | FITC        | 1D3      | Biologend     | 152403   |
| CD19       | PE          | 1D3      | Biologend     | 152407   |
| CD3ε       | PE          | 145-2c11 | Biologend     | 100307   |
| CD4        | PE          | RM4-5    | Biologend     | 100511   |

|                                                                    |              |          |                           |             |
|--------------------------------------------------------------------|--------------|----------|---------------------------|-------------|
| CD4                                                                | PerCP        | RM4-5    | Biolegend                 | 100537      |
| CD8 $\alpha$                                                       | Pacific Blue | 53-6.7   | Biolegend                 | 100728      |
| CD8 $\alpha$                                                       | PE           | 53-6.7   | Biolegend                 | 100707      |
| CD8 $\alpha$                                                       | PerCP        | 53-6.7   | Biolegend                 | 100731      |
| CD8 $\beta$                                                        | PE           | H35-17.2 | eBioscience               | 12-0083-82  |
| CD49b                                                              | APC          | DX5      | Biolegend                 | 108909      |
| Granzyme B                                                         | APC          | GB11     | eBioscience               | GRB05       |
| IFN $\beta$                                                        | FITC         | RMMB1    | Novus<br>Biologicals      | 22400-3     |
| IFN $\gamma$                                                       | A700         | XMG1.2   | eBioscience               | 56-7311-82  |
| IL-12                                                              | APC          | C15-6    | Biolegend                 | 505205      |
| Ki67                                                               | Pacific Blue | B56      | Biolegend                 | 350513      |
| NK-1.1                                                             | BV510        | PK136    | BD Biosciences            | 563096      |
| NK-1.1                                                             | APC          | PK136    | BD Biosciences            | 561117      |
| NKp46                                                              | PE           | 29A1.4   | eBioscience               | 12-3351-82  |
| Streptavidin                                                       | PE-Cy7       |          | BD Biosciences            | 557598      |
| Purified NK1.1                                                     |              | PK136    | BD Biosciences            | 553162      |
| Purified polyclonal rat IgG, F(ab') <sub>2</sub> fragment specific |              |          | Jackson<br>ImmunoResearch | 212-005-106 |
| CD117                                                              | BV605        | 2B8      | Biolegend                 | 105847      |
| Sca-1                                                              | PerCP-Cy5.5  | D7       | eBioscience               | 45-5981-82  |
| CD34                                                               | A700         | RAM34    | eBioscience               | 56-0341-82  |
| CD16/32                                                            | PE           | 2.4G2    | BD Biosciences            | 553145      |
| CD11b                                                              | PECF594      | M1/70    | BD Biosciences            | 562287      |
| Ly6G                                                               | FITC         | 1A8      | eBioscience               | 11-9668-82  |
| Ly6C                                                               | APC          | HK1.4    | eBioscience               | 17-5932-82  |
| Ultra-LEAF Purified CD115                                          |              | AFS98    | Biolegend                 | 135537      |
| CD45.2                                                             | PerCP/Cy5.5  | 104      | BD Biosciences            | 552950      |
| CD45.1                                                             | V450         | A20      | BD Biosciences            | 560520      |



|                             |              |          |                |            |
|-----------------------------|--------------|----------|----------------|------------|
| Ter119                      |              | TER-119  | eBioscience    | MA1-70078  |
| CD71                        |              | R17217   | eBioscience    | 14-0711-82 |
| LIVE/DEAD<br>Fixable Violet |              |          | Invitrogen     | L34955     |
| LIVE/DEAD<br>Fixable Aqua   |              |          | Invitrogen     | L34957     |
| CD3                         | APC-Cy7      | SP34-2   | BD Biosciences | 557757     |
| CD4                         | APC-H7       | SK3      | BD Biosciences | 641398     |
| CD14                        | PE-Cy5       | TuK4     | Invitrogen     | MHCD1406   |
| CD16                        | Pacific Blue | 3G8      | BD Biosciences | 558122     |
| CD56                        | PE-Cy7       | NCAM16.2 | BD Biosciences | 335809     |
| Granzyme B                  | PE CF594     | GB11     | BD Biosciences | 562462     |
| CD34                        | PE-Cy7       | 581      | Biolegend      | 343515     |
| CD38                        | BV650        | HIT2     | Biolegend      | 303505     |
| CD45RA                      | Pacific Blue | HI100    | Biolegend      | 304117     |
| CD11b                       | FITC         | M1/70    | Biolegend      | 101205     |
| CD64                        | PE/Dazzle594 | 10.1     | Biolegend      | 305031     |
| CD66b                       | APC-Cy7      | G10F5    | Biolegend      | 305125     |
| HLA-DR                      | AF647        | L243     | Biolegend      | 307621     |
| IL15R $\alpha$              | PE           | JM7A4    | Biolegend      | 330207     |
| CX3CR1                      | FITC         | SA011F11 | Biolegend      | 149019     |
| CD45.2                      | PerCP/Cy5.5  | 104      | BD Biosciences | 552950     |
| CD45.1                      | V450         | A20      | BD Biosciences | 560520     |
| CD11b                       | BV605        | M1/70    | BD Biosciences | 563015     |
| F4/80                       | BV785        | BM8      | Biolegend      | 123141     |
| CD3 $\epsilon$              | APC/AF6      | 145.2C11 | BD Biosciences |            |
| Ly6C                        | AC7          | HK1.4    | Biolegend      | 128025     |
| CD19                        | PEC7         | 6D5      | Biolegend      | 115519     |

957 **Table S1. Information on flow cytometry antibodies.** The following antibodies were used  
958 according to the manufacturer's instructions throughout the study. Antibodies from LIVE/DEAD  
959 Fixable Aqua onwards refers to the antibodies used for the experiments using G-CSF-mobilized

960 HSPCs. Antibodies from CX3CR1 onwards refers to the antibodies used for the  
961 allotransplantation studies.  
962

963

| <b>Antigen</b>                                                           | <b>Fluorophore</b> | <b>Clone</b> | <b>Manufacturer</b>              | <b>Cat. No.</b> |
|--------------------------------------------------------------------------|--------------------|--------------|----------------------------------|-----------------|
| NK-1.1<br>(IgG2a)                                                        | Unconjugated       | PK136        | Invitrogen                       | MA1-70100       |
| m123/IE-1<br>(MCMV)                                                      | Unconjugated       | IE1.01       | Capri (Center<br>for Proteomics) | HR-MCMV-<br>12  |
| Goat anti-<br>Mouse IgG2a<br>Cross-<br>adsorbed<br>secondary<br>antibody | Alexa Fluor 594    |              | Invitrogen                       | A-21135         |

**Table S2. Information on immunofluorescence antibodies.** The following antibodies were used according to the manufacturer's instructions throughout the study.

964

965

966

| <b>Gene</b>   | <b>Forward sequence (5'-.3')</b>  | <b>Reverse sequence (5'-.3')</b> |
|---------------|-----------------------------------|----------------------------------|
| <i>HPRT</i>   | CTGATAAAATCTACAGTCATAGGAA<br>TGGA | GGCCCTCTGTGTGCTCAAG              |
| <i>IFNG</i>   | CCACGGCACAGTCATTGAAA              | GCCAGTTCCTCCAGATATCCAA           |
| <i>PRF1</i>   | GATGTGAACCCTAGGCCAGA              | AAAGAGGTGGCCATTTTGTG             |
| <i>CEBPA</i>  | CAAGAACAGCAACGAGTACCG             | GTCACTGGTCAACTCCAGCAC            |
| <i>MITF</i>   | ACTTTCCCTTATCCCATCCACC            | TGAGATCCAGAGTTGTTCGTACA          |
| <i>NKG2D</i>  | ACGTTTCAGCCAGTATTGTGC             | GGAAGCTTGGCTCTGGTTC              |
| <i>IRF3</i>   | GAGAGCCGAACGAGGTTTCAG             | CTTCCAGGTTGACACGTCCG             |
| <i>IRF7</i>   | CTTCCCTATTTTCCGTGGCTG             | TCCAGTTGATCCGCATAAGGT            |
| <i>IFNB1</i>  | CAGCTCCAAGAAAGGACGAAC             | GGCAGTGTAACCTTTCTGCAT            |
| <i>IL15RB</i> | TGGAGCCTGTCCCTCTACG               | TCCACATGCAAGAGACATTGG            |
| <i>JAK3</i>   | CCATCACGTTAGACTTTGCCA             | GGCGGAGAATATAGGTGCCTG            |
| <i>STAT5B</i> | CGATGCCCTTCACCAGATG               | AGCTGGGTGGCCTTAATGTTC            |
| <i>IKAROS</i> | Mm00496114_m1                     |                                  |
| <i>ID2</i>    | Mm00711781_m1                     |                                  |
| <i>RUNX3</i>  | Mm00490666_m1                     |                                  |
| <i>GATA3</i>  | Mm00484683_m1                     |                                  |
| <i>TBET</i>   | Mm00450960_m1                     |                                  |
| <i>EOMES</i>  | Mm01351985_m1                     |                                  |
| <i>E2F1</i>   | Mm00432939_m1                     |                                  |
| <i>E2F2</i>   | Mm00809102_s1                     |                                  |
| <i>E2F4</i>   | Mm00514160_m1                     |                                  |
| <i>E2F6</i>   | Mm00519030_m1                     |                                  |

967 **Table S3. Information on primer sequences.** The following forward and reverse primers were  
968 used for microfluidic real-time PCR throughout the study. The assay IDs from *IKAROS* onwards  
969 refer to Fluidigm experiments.

970

971



972 **Supplementary figures**

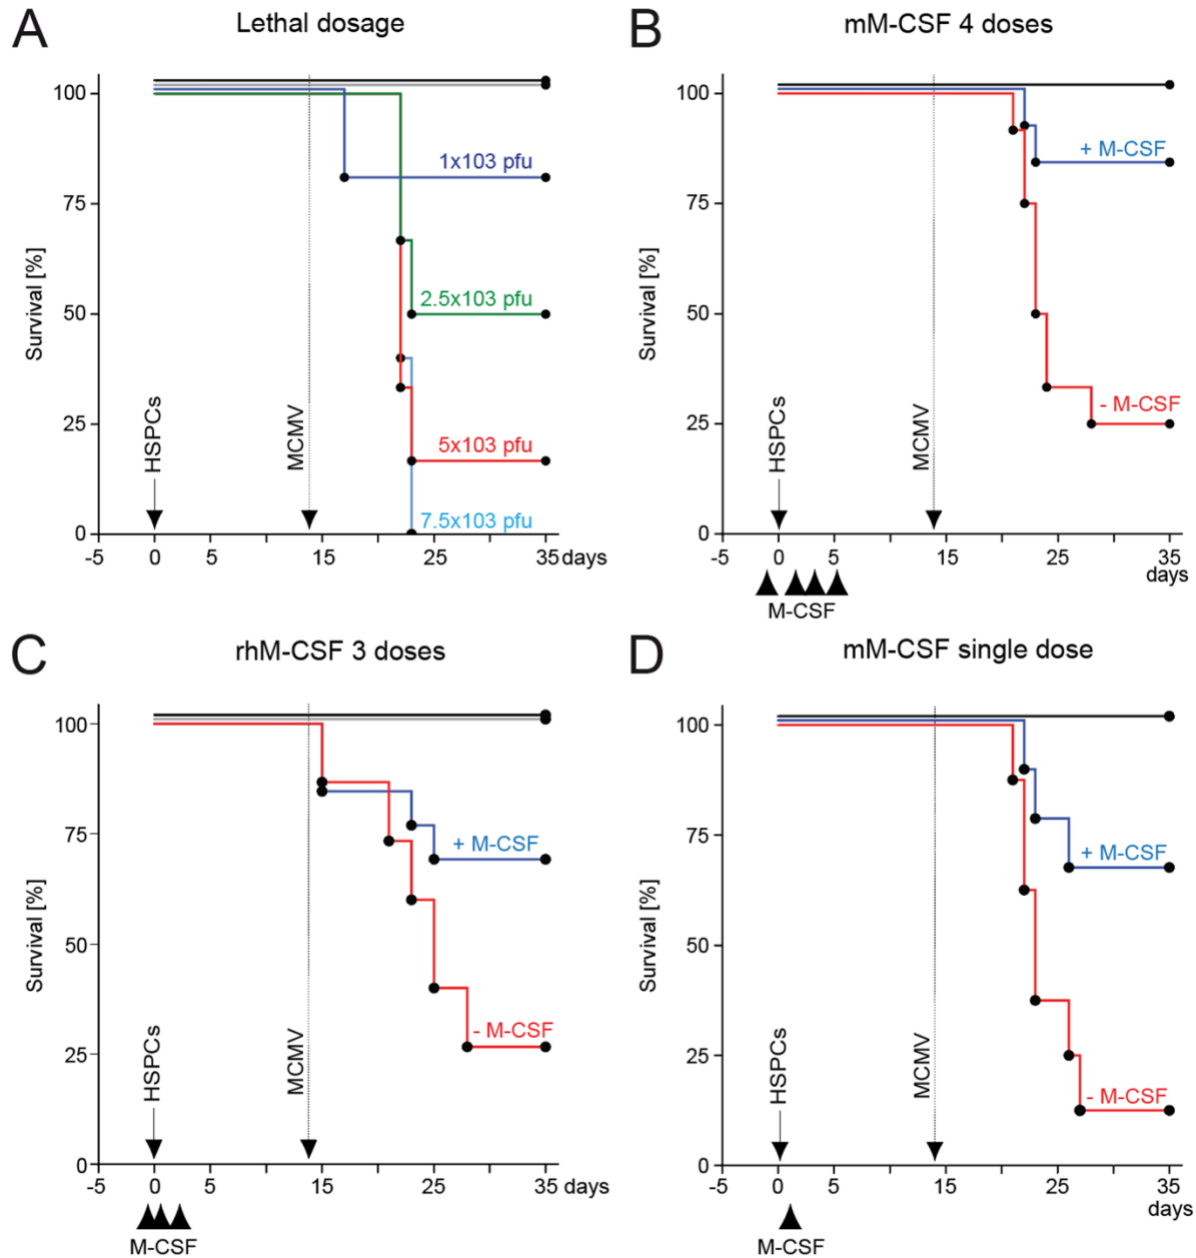

973  
 974 **Fig. S1. Titration of treatment regimen for MCMV infection and M-CSF treatments.** (A)  
 975 Survival of HSPC-transplanted mice after MCMV infection. Two weeks after HCT, mice received  
 976 MCMV intraperitoneally: 1,000 PFU (violet; n = 5), 2,500 PFU (green; n = 6), 5,000 PFU (red; n  
 977 = 6) and 7,500 PFU (blue; n = 5). Transplantation controls (black; n = 10). Non-irradiated, non-  
 978 transplanted mice with 7,500 PFU served as infection controls (brown; n = 6). (B) Treatment  
 979 regimen with different doses and sources of M-CSF. Survival of mice after infection (arrow),  
 980 control (-M-CSF, red) or M-CSF (+ M-CSF, blue) or transplanted, uninfected control mice (black).  
 981 HSPC-transplantation (solid arrow), MCMV infection (stippled) and different intravenous doses  
 982 of control or M-CSF. Treatment regimen with 4 doses (-1h, d+1, d+3, d+5) of 10 µg baculoviral-  
 983 expressed mouse M-CSF (-M-CSF, n = 12; +M-CSF, n = 11; control, n = 5). (C) Like B. Treatment

984 regimen with 3 doses (-1h, +5h, +18h) of 10  $\mu$ g human recombinant M-CSF (- M-CSF, n = 15; +  
985 M-CSF, n = 13; control, n = 5). (D) Like (B) Treatment regimen with a single dose (+5h) of 10  $\mu$ g  
986 baculoviral-expressed mouse M-CSF. (- M-CSF, n = 8; +M-CSF, n = 9; control, n = 5). \*\*\*  $P <$   
987 0.0001 by Mantel-Cox test (B-D).  
988

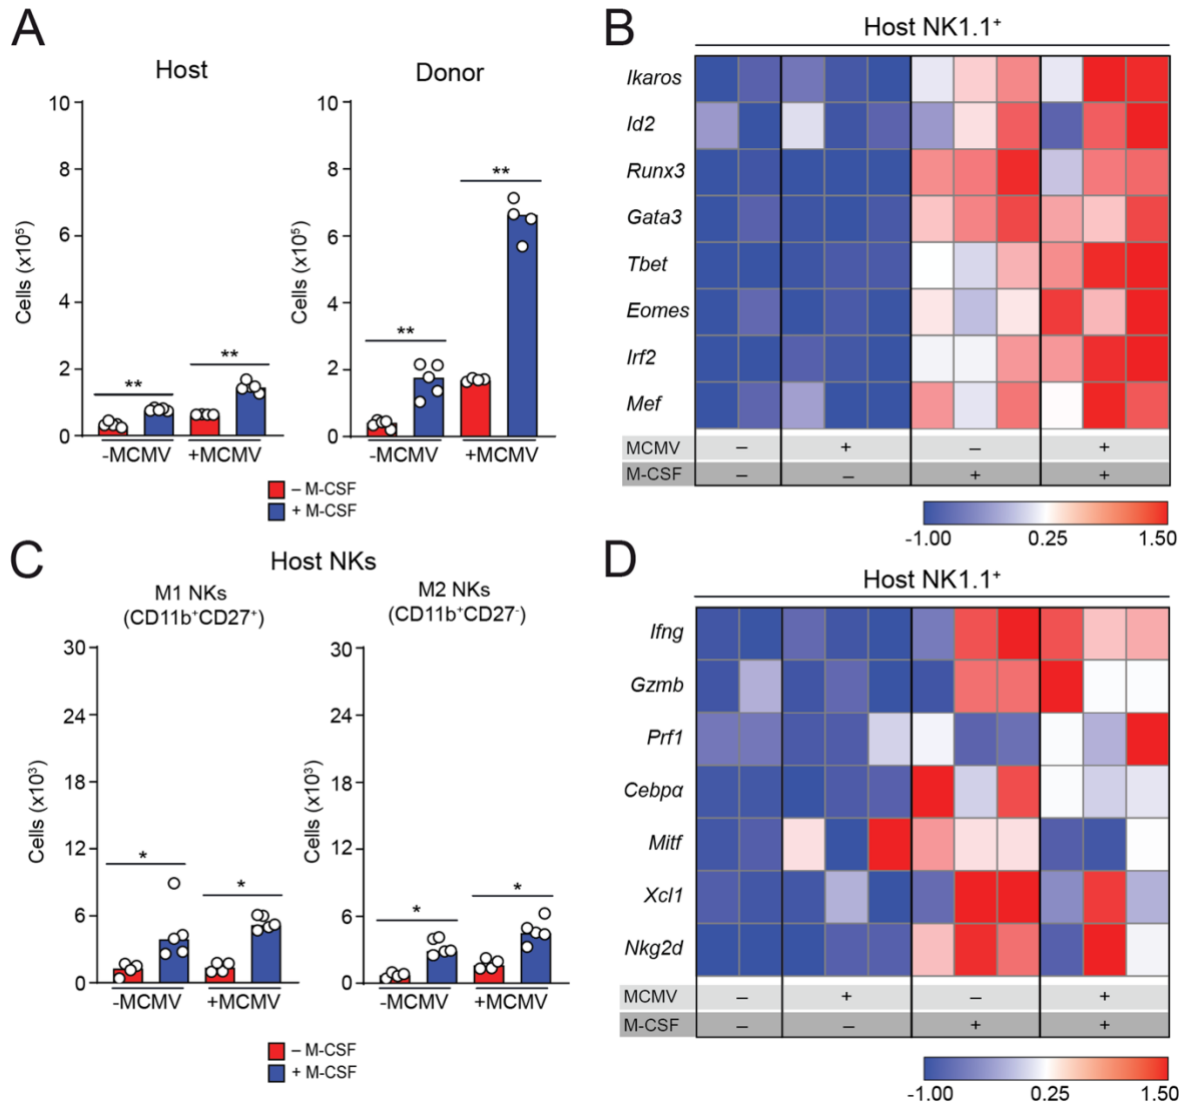

989  
990 **Fig. S2. M-CSF effect on NK cell production, maturation and differentiation in donor and**  
991 **recipient cells after hematopoietic cell transplantation.** (A) Median of absolute numbers of  
992 (CD45.2<sup>+</sup>) recipient (left) and (CD45.1<sup>+</sup>) donor (right) NK cells (CD19<sup>+</sup>CD3<sup>+</sup>Ly6G<sup>+</sup>NK1.1<sup>+</sup>). (B)  
993 Gene expression profiling of transcription factors measured by nanofluidic Fluidigm array RT-  
994 qPCR of host-derived NK cells, which were isolated from the spleens of control or M-CSF-treated  
995 recipient mice 1.5 days after MCMV or infection or time-matched, mock-infected, HSPC-  
996 transplanted mice. (C) Median of absolute numbers of host-derived M1 NK cells (CD11b<sup>+</sup>CD27<sup>+</sup>)  
997 and host-derived M2 NK cells (CD11b<sup>+</sup>CD27<sup>-</sup>) in the spleen of PBS control or M-CSF-treated  
998 recipient mice 1.5 days after MCMV or mock infection 14 days after HSPC transplantation. \**P* <  
999 0.05 by Mann-Whitney U-test. (D) Gene expression profiling of host-derived NK cells, which  
1000 were isolated from the spleen of control or M-CSF-treated recipient mice 1.5 days after MCMV  
1001 or mock infection for activation and maturation related factors by RT-qPCR.  
1002

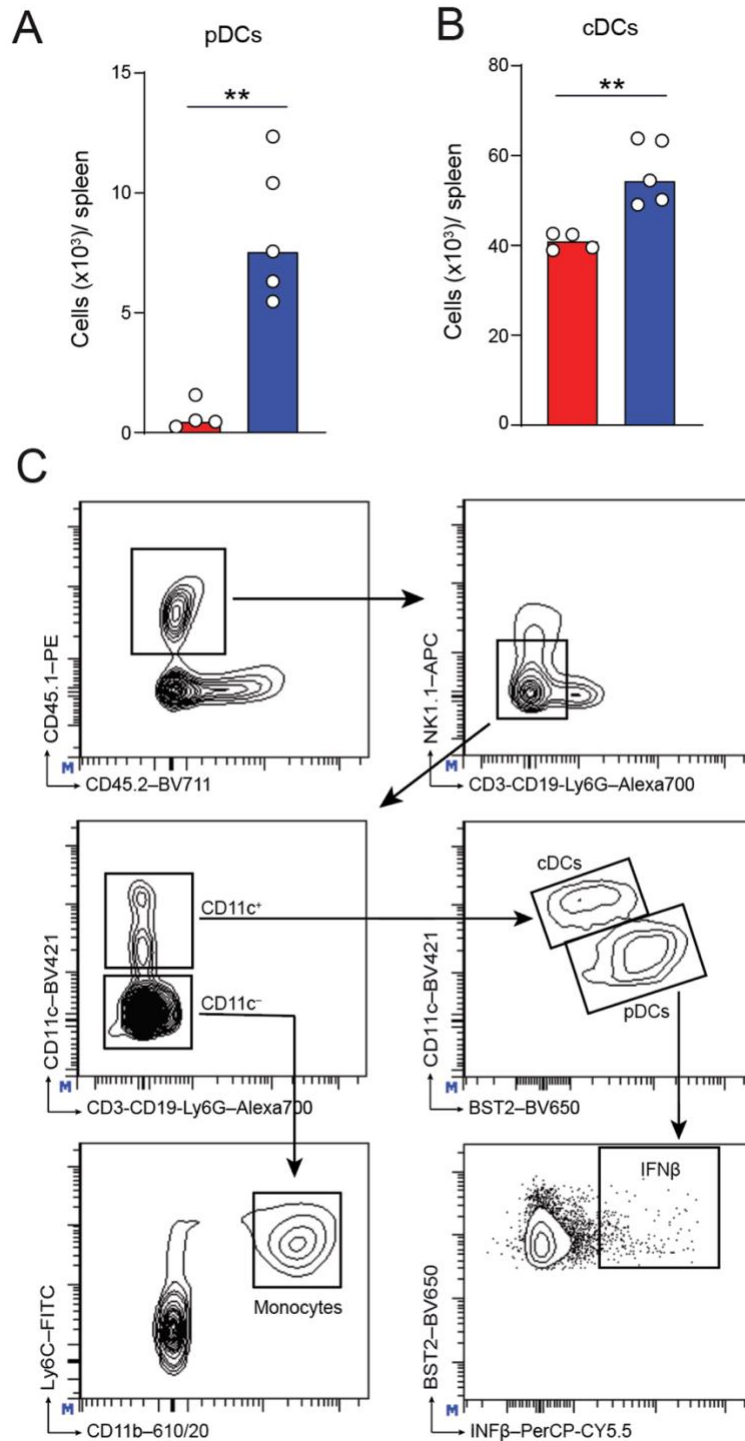

1003  
 1004 **Fig. S3. M-CSF increases myelopoiesis of plasmacytoid dendritic cells and conventional**  
 1005 **dendritic cells.** (A) Median of absolute numbers of donor-derived spleen pDCs (Lin<sup>-</sup>  
 1006 CD11c<sup>lo</sup>BST2<sup>high</sup>) of mice treated with PBS control or M-CSF 14 days after HCT and analyzed  
 1007 after an additional 1.5 days of MCMV or mock infection. (B) Median of absolute numbers of cDCs  
 1008 (Lin<sup>-</sup>CD11c<sup>+</sup>BST2<sup>-/low</sup>) of mice treated with PBS control or M-CSF 14 days after HCT and  
 1009 analyzed after an additional 1.5 days of MCMV or mock infection. (A-B) **\*\*** $P < 0.01$  by Mann-  
 1010 Whitney  $U$ -test. (C) Gating strategy for CD45.1<sup>+</sup> monocytes, pDCs, IFN- $\beta$  and cDCs.

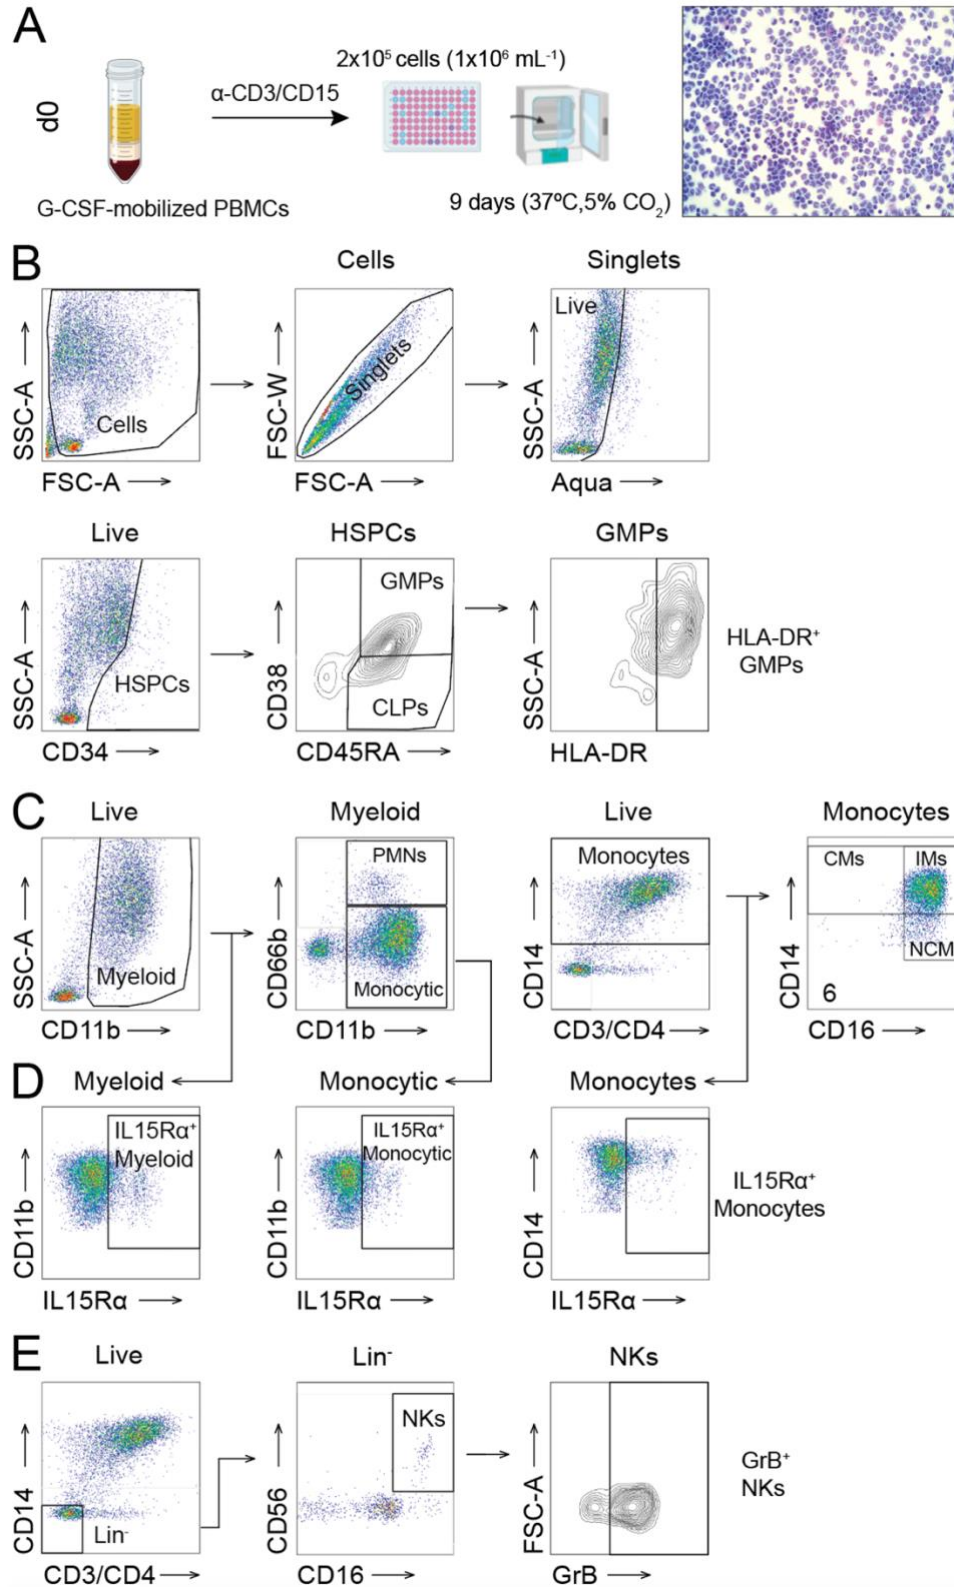

1011

1012

1013

1014

**Fig. S4. Gating strategy for M-CSF-driven myeloipoiesis in G-CSF-mobilized human PBMCs, IL15R $\alpha$  expression and NK cell frequency and activity.** (A) Workflow for G-CSF-mobilized leukapheresis samples (B) Gating strategy for flow cytometric assessment. (C) “Live”



1015 singlets assessed for CD11b (“Myeloid” cells): polymorphonuclear neutrophils (PMNs,  
1016 CD11b<sup>+</sup>CD66b<sup>+</sup>) and CD11b<sup>+</sup>CD66b<sup>-</sup> “Monocytic” cells. “Monocytes” (CD14<sup>+</sup>): classical  
1017 monocytes (CMs, CD14<sup>+</sup>CD16<sup>-</sup>), intermediate monocytes (IMs, CD14<sup>+</sup>CD16<sup>+</sup>) or non-classical  
1018 monocytes (NCMs, CD14<sup>-</sup>CD16<sup>+</sup>). (D) IL15R $\alpha$  expression measured on myeloid, monocytic cells,  
1019 or monocytes identified in (C). (E) The gating strategy of OMIP-027 with minor modifications.  
1020

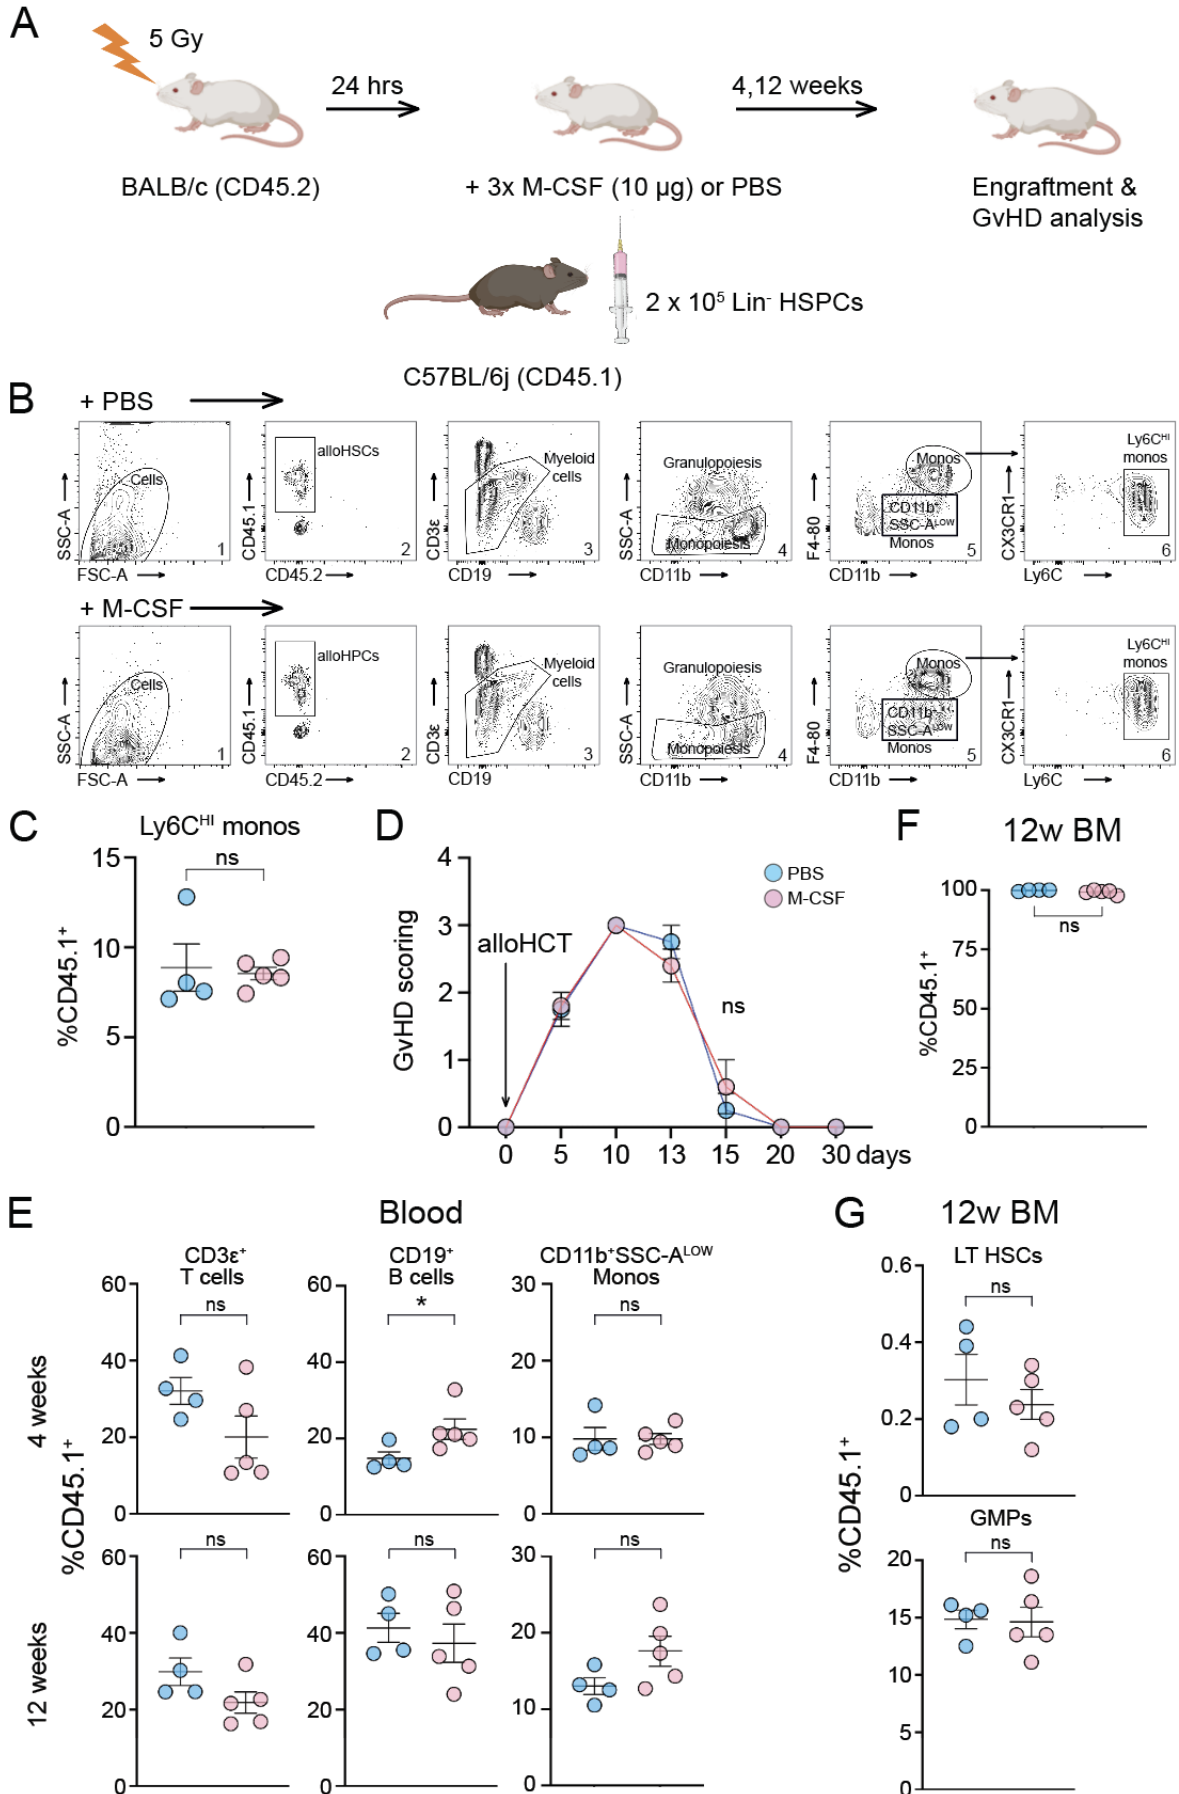

1022 **Fig. S5. M-CSF does neither confer adverse effects on tri-lineage long-term engraftment nor**  
1023 **on GvHD after allogeneic hematopoietic cell transplantation.** (A) The protocol for allogeneic  
1024 hematopoietic stem cell transplantations (alloHCT) between BALB/c CD45.2<sup>+</sup> recipient and  
1025 C57BL/6j CD45.1<sup>+</sup> donor mice is shown. Imminently before (1 hr) or shortly after (5 hrs, 20 hrs)  
1026 alloHCT with 2 x 10<sup>5</sup> lineage negative (Lin<sup>-</sup>) hematopoietic stem and progenitor cells (HSPCs),  
1027 the mice received PBS or 10 µg of baculoviral-expressed human M-CSF. Graft-versus-host-  
1028 disease (GvHD) scores and engraftment of CD45.1<sup>+</sup> cells were assessed at 4 and 12 weeks after  
1029 alloHCT using the gating strategy by Alexander *et al.* (B). (C) Quantification of inflammatory  
1030 Ly6C<sup>HI</sup> CD11b<sup>+</sup>F4/80<sup>+</sup> monocytes of CD45.1<sup>+</sup> cells. (D) GvHD scoring (Lai *et al.*). (E)  
1031 Tri-lineage engraftment (CD3ε<sup>+</sup> T cells, CD19<sup>+</sup> B cells, CD11b<sup>+</sup>SSC-A<sup>LOW</sup> monocytes) at 4 and  
1032 12 weeks post-HCT in the blood. (F) CD45.1<sup>+</sup> cells in the bone marrow (BM) 12 weeks after  
1033 alloHCT. (G) Percentage of HSCs (KSL Flt3<sup>-</sup>CD150<sup>+</sup>CD48<sup>-</sup>) and GMPs in CD45.1<sup>+</sup> lineage  
1034 negative BM cells 12 weeks after alloHCT. The data are illustrated as mean ± SEM. The Mann-  
1035 Whitney *U*-test was used to test for statistical significance between PBS-treated (n = 4) or M-CSF-  
1036 treated allografted mice (n = 5). \* *P* < 0.05, ns = not significant.
